# Supplementary material for: Retrospective analysis of infection and antimicrobial resistance patterns of Mycoplasma genitalium among pregnant women in the southwestern USA
Source: PubMed Central journal article supplement — BMJ Open. 2021 Jun 14;11(6):e050475. doi: 10.1136/bmjopen-2021-050475 (PMC8204150; doi:10.1136/bmjopen-2021-050475), 2021-06-14
Supplement: bmjopen-2021-050475.draft_revisions.pdf [file bmjopen-2021-050475.draft_revisions.pdf]

# BMJ Open

BMJ Open is committed to open peer review. As part of this commitment we make the peer review history of every article we publish publicly available.

When an article is published we post the peer reviewers' comments and the authors' responses online. We also post the versions of the paper that were used during peer review. These are the versions that the peer review comments apply to.

The versions of the paper that follow are the versions that were submitted during the peer review process. They are not the versions of record or the final published versions. They should not be cited or distributed as the published version of this manuscript.

BMJ Open is an open access journal and the full, final, typeset and author-corrected version of record of the manuscript is available on our site with no access controls, subscription charges or pay-per-view fees (<http://bmjopen.bmj.com>).

If you have any questions on BMJ Open's open peer review process please email [info.bmjopen@bmj.com](mailto:info.bmjopen@bmj.com)

# BMJ Open

## Infection and antimicrobial resistance patterns of *Mycoplasma genitalium* among pregnant women

|                               |                                                                                                                                                                                                                                                                                                                                                                                                                                                                                                                                                                                                                                                                                                                   |
|-------------------------------|-------------------------------------------------------------------------------------------------------------------------------------------------------------------------------------------------------------------------------------------------------------------------------------------------------------------------------------------------------------------------------------------------------------------------------------------------------------------------------------------------------------------------------------------------------------------------------------------------------------------------------------------------------------------------------------------------------------------|
| Journal:                      | <i>BMJ Open</i>                                                                                                                                                                                                                                                                                                                                                                                                                                                                                                                                                                                                                                                                                                   |
| Manuscript ID                 | bmjopen-2021-050475                                                                                                                                                                                                                                                                                                                                                                                                                                                                                                                                                                                                                                                                                               |
| Article Type:                 | Original research                                                                                                                                                                                                                                                                                                                                                                                                                                                                                                                                                                                                                                                                                                 |
| Date Submitted by the Author: | 24-Feb-2021                                                                                                                                                                                                                                                                                                                                                                                                                                                                                                                                                                                                                                                                                                       |
| Complete List of Authors:     | Stafford, Irene; The University of Texas Health Science Center at Houston, Department of Obstetrics and Gynecology<br>Hummel, Kelsey; Baylor College of Medicine, Department of Pathology and Immunology<br>Dunn, James J.; Baylor College of Medicine, Department of Pathology and Immunology<br>Muldrew, Kenneth; Baylor College of Medicine, Department of Pathology and Immunology<br>Berra, Alexandra; Baylor College of Medicine, Obstetrics and Gynecology<br>Kravitz, Elizabeth; Baylor College of Medicine, Obstetrics and Gynecology<br>Gogia, Soumya; Baylor College of Medicine,<br>Martin, Irene; Public Health Agency of Canada,<br>Munson, Erik; Marquette University, Clinical Laboratory Science |
| Keywords:                     | BACTERIOLOGY, Reproductive medicine < GYNAECOLOGY, INFECTIOUS DISEASES, Maternal medicine < OBSTETRICS, OBSTETRICS                                                                                                                                                                                                                                                                                                                                                                                                                                                                                                                                                                                                |
|                               |                                                                                                                                                                                                                                                                                                                                                                                                                                                                                                                                                                                                                                                                                                                   |

SCHOLARONE™  
Manuscripts

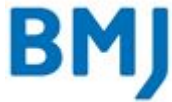

I, the Submitting Author has the right to grant and does grant on behalf of all authors of the Work (as defined in the below author licence), an exclusive licence and/or a non-exclusive licence for contributions from authors who are: i) UK Crown employees; ii) where BMJ has agreed a CC-BY licence shall apply, and/or iii) in accordance with the terms applicable for US Federal Government officers or employees acting as part of their official duties; on a worldwide, perpetual, irrevocable, royalty-free basis to BMJ Publishing Group Ltd ("BMJ") its licensees and where the relevant Journal is co-owned by BMJ to the co-owners of the Journal, to publish the Work in this journal and any other BMJ products and to exploit all rights, as set out in our [licence](#).

The Submitting Author accepts and understands that any supply made under these terms is made by BMJ to the Submitting Author unless you are acting as an employee on behalf of your employer or a postgraduate student of an affiliated institution which is paying any applicable article publishing charge ("APC") for Open Access articles. Where the Submitting Author wishes to make the Work available on an Open Access basis (and intends to pay the relevant APC), the terms of reuse of such Open Access shall be governed by a Creative Commons licence – details of these licences and which [Creative Commons](#) licence will apply to this Work are set out in our licence referred to above.

Other than as permitted in any relevant BMJ Author's Self Archiving Policies, I confirm this Work has not been accepted for publication elsewhere, is not being considered for publication elsewhere and does not duplicate material already published. I confirm all authors consent to publication of this Work and authorise the granting of this licence.

1  
2  
3 **1 Infection and antimicrobial resistance patterns of *Mycoplasma genitalium* among pregnant**  
4  
5 **2 women**  
6  
7

8 Irene A. Stafford MD<sup>1</sup> irene.stafford@uth.tmc.edu, Kelsey Hummel MD<sup>2</sup>,  
9 Kelsey.hummel@bcm.edu, James J. Dunn PhD<sup>2</sup> jjdunn@texaschildrens.org, Kenneth L. Muldrew,  
10 MD<sup>2</sup> muldrew@bcm.edu, Alexandra Berra MD<sup>3</sup> alexandra.berra@bcm.edu, Elizabeth S. Kravitz,  
11 BS<sup>3</sup> elizabeth.kravitz@bcm.edu, Soumya Gogia, BS<sup>3</sup> soumya.gogia@bcm.edu, Irene Martin BSc<sup>4</sup>  
12 irene.martin@canada.ca, Erik Munson PhD<sup>5</sup> erik.munson@marquette.edu  
13  
14  
15  
16  
17  
18  
19

20  
21 *(1) Department of Obstetrics and Gynecology, University of Texas Health Science Center,*  
22 *McGovern Medical School, 6431 Fannin MSB 3.286, Houston, TX 77030, (2) Department of*  
23 *Pathology and Immunology; Baylor College of Medicine, MC315 1 Baylor Plaza Houston, TX*  
24 *77030 832-824-2662, 615-429-6825, (3) Department of Obstetrics and Gynecology; Baylor*  
25 *College of Medicine, 6651 Main Street, Houston, TX 77030 (4) JC Wilt Infectious Diseases*  
26 *Research Centre 745 Logan Avenue, Winnipeg, Manitoba 1 204-789-2000, (5) College of Health*  
27 *Sciences, Marquette University, Schroeder Complex, Room 244 Milwaukee, WI 53233 (414)*  
28 *288-5053*  
29  
30  
31  
32  
33  
34  
35  
36  
37  
38  
39  
40  
41

42 **Contributorship Statement:**  
43

44 All authors were responsible for data entry which was reviewed by the lead author and validated.  
45  
46 Irene A. Stafford MD, Kelsey Hummel MD, James J. Dunn PhD, Kenneth L. Muldrew, MD,  
47  
48 Alexandra Berra MD, Elizabeth S. Kravitz, BS, Soumya Gogia, BS, Irene Martin BSc, and Erik  
49  
50 Munson PhD all contributed to the data collection, data analysis, protocol development and  
51  
52 manuscript preparation. Irene A Stafford, MD is the guarantor for the overall content.  
53  
54  
55  
56  
57  
58  
59  
60

1  
2  
3 **23 Abstract:**  
4  
5

6  
7 24 Background: *Mycoplasma genitalium* is a sexually transmitted infection. There have been no  
8  
9 25 published studies concerning symptomatology, prevalence data, antibiotic resistance profiling or  
10  
11 26 reports of co-infection with other STI in pregnant women.  
12

13  
14  
15 27 Objective: To describe these characteristics among pregnant women attending prenatal clinics in  
16  
17 28 a large tertiary care center.  
18

19  
20  
21 29 Design: Remnant genital samples collected from pregnant women between August 2018 and  
22  
23 30 November 2019 were tested for *M. genitalium* and *Trichomonas vaginalis* by the transcription-  
24  
25 31 mediated amplification technique. Specimens with detectable *M. genitalium* RNA were sequenced  
26  
27 32 for 23S rRNA mutations associated with azithromycin resistance and parC and gyrA mutations  
28  
29 33 associated with resistance to moxifloxacin. Demographic, obstetric and STI co-infection data were  
30  
31 34 recorded.  
32  
33

34  
35 35 Results: Of the 719 samples, 41 (5.7 %) were positive for *M. genitalium*. *M. genitalium* infection  
36  
37 36 was associated with Black race, Hispanic ethnicity and young age (p= .003, .008 and .004  
38  
39 37 respectively). *M. genitalium* infection was also associated with *T. vaginalis* co-infection and  
40  
41 38 Streptococcus agalactiae (GBS) colonization (p = <0.001 and .002 respectively). Of the 41 positive  
42  
43 39 samples, 26 (63.4%) underwent successful sequencing. Eight (30.8%) had 23S rRNA mutations  
44  
45 40 related to azithromycin resistance. One of 26 (3.8%) positive samples with sequencing results had  
46  
47 41 the gyrA gene mutation and 1 of 18 sequenced samples (5.6%) had the parC gene mutation  
48  
49 42 associated with moxifloxacin resistance.  
50  
51  
52  
53  
54  
55  
56  
57  
58  
59  
60

1  
2  
3 43 Conclusions: Prevalence rates of *M. genitalium* in pregnant women was 5.7%. *M. genitalium*  
4  
5 44 infection disproportionately affects young Black women co-infected with *T. vaginalis*. Pregnant  
6  
7  
8 45 women remain at risk for persistent infection with *M. genitalium* due to decreased azithromycin  
9  
10 46 susceptibility.

#### 11 47 **Strengths and Limitations:**

##### 12 48 Strengths:

- 13 49 • This analysis is one of the largest evaluating prevalence rates of *M. genitalium* in pregnant  
14 50 women presenting for routine care.
- 15 51 • *Mycoplasma genitalium* infection disproportionately affecting young Black pregnant  
16 52 women who are more likely to be co-infected with *Trichomonas vaginalis* and colonized  
17 53 with group B *Streptococcus* (GBS).
- 18 54 • Azithromycin resistance among *M. genitalium* isolates collected from pregnant women  
19 55 was 30.8%

##### 20 56 Weaknesses:

- 21 57 • Perinatal outcome data was not recorded.
- 22 58 • Prospective data regarding persistent infection was not collected in this analysis.

#### 23 59 24 60 **Funding Statement:**

25 61 This research received no specific grant from any funding agency in the public, commercial or  
26 62 not-for-profit sectors.

#### 27 63 **Competing Interest Statement:**

64 The lead author, Irene A Stafford, MD affirms that this manuscript is an honest, accurate and  
65 transparent account of the study being reported; that no important aspects of the study have been  
66 omitted. The authors report no conflict of interest.

67 The corresponding author confirms on behalf of all authors that there have been no involvements  
68 that might raise the question of bias in the work reported or in the conclusions, implications, or  
69 opinions stated.

#### 70 **Data Sharing:**

71 De-identified data will be available upon written request.

#### 73 **Introduction:**

74 *Mycoplasma genitalium* is an emerging cause of sexually transmitted disease in women<sup>1-</sup>  
75 <sup>10</sup>. Due to its fastidious nature, culture technique methods have not proven to successfully identify  
76 organism in the clinical environment<sup>1-8</sup>. Fortunately, with the recent developments of highly  
77 sensitive molecular platforms, *M. genitalium* can expeditiously be detected in urogenital samples  
78 with > 97% sensitivity<sup>11-20</sup>. As a result, contemporary studies have demonstrated this organism to  
79 extend beyond the role as a causative agent for non-gonococcal urethritis among men and has now  
80 been implicated in female genital tract pathology, including infectious sequelae similar to  
81 *Chlamydia trachomatis*, such as cervicitis, pelvic inflammatory disease and preterm birth<sup>21-28</sup>.

82 To date, six studies have assessed the role of *M. genitalium* with pregnancy related  
83 complications, including a 2015 meta-analysis (N = 3,128) in which *M. genitalium* was found to  
84 be significantly associated with an increased risk of preterm birth prior to 37 weeks (pooled OR  
85 1.89), with an even higher ratio when other STI were accounted for (pooled OR 2.3)<sup>22-28</sup>. The meta-  
86 analysis by Lis et. al<sup>28</sup> demonstrated the limitations of prior published data mainly related to

1  
2  
3 87 varying prevalence rates ranging from 2 – 20 % in women, with scant data concerning rates of  
4  
5 88 infection among pregnant women<sup>4-7,20-29-33</sup>. Characteristics of *M. genitalium* infection, including  
6  
7 89 symptomatology, antibiotic susceptibility patterns and co-infection rates with other STI agents  
8  
9 90 have not been evaluated in pregnant women presenting for care<sup>29-33</sup>. The objective of this study  
10  
11 91 was to determine these characteristics among a cohort of pregnant women in a large tertiary  
12  
13 92 obstetrical care center.  
14  
15  
16  
17  
18  
19  
20

## 21 94 **Materials and Methods:**

22  
23  
24 95 After Institutional Review Board approval from the Baylor College of Medicine, all  
25  
26 96 remnant Aptima Multitest clinician-collected endocervical samples from pregnant women  
27  
28 97 presenting to care between August 30, 2018 and November 30, 2019 were placed in the Aptima  
29  
30 98 swab specimen transport tube, stored for up to 30 days and shipped monthly by overnight mail to  
31  
32 99 Marquette University, Milwaukee, WI for *M. genitalium* 16S rRNA and *Trichomonas vaginalis*  
33  
34 100 testing by the transcription - mediated amplification technique utilizing Panther System  
35  
36 101 automation (Hologic, Inc., San Diego, CA) as previously described<sup>11-20</sup>. Only one sample  
37  
38 102 collected at intake to care was used for each patient presenting obstetrical care and received  
39  
40 103 testing with the Aptima swab for *N. gonorrhoeae* and *C. trachomatis* per institutional protocol  
41  
42 104 and guidelines.  
43  
44  
45  
46  
47

48 105 *M. genitalium* positive specimens were shipped to the Public Health Agency of Canada,  
49  
50 106 National Microbiology Laboratory for additional testing. DNA was extracted from the specimens  
51  
52 107 using the MagNA Pure DNA and Viral Nucleic Acid kit (Roche, Laval, Quebec) per  
53  
54 108 manufacturer's instruction. Specimens with detectable *M. genitalium* DNA were subsequently  
55  
56  
57  
58  
59  
60



1  
2  
3 109 analyzed by sequencing the 23S rRNA gene to identify mutations associated with azithromycin  
4  
5 110 resistance and *parC* and *gyrA* genes associated with resistance to moxifloxacin<sup>2,20,21,26,27</sup>.

7  
8 111 Demographic variables, obstetrical data, pelvic symptoms consistent with cervicitis (pelvic  
9  
10 112 pressure, vaginal discharge, lower abdominal cramping), and STI co-infection [*Neisseria*  
11  
12 113 *gonorrhoeae*, *Chlamydia trachomatis*, herpes simplex virus, human immunodeficiency virus,  
13  
14 114 *Trichomonas vaginalis*, human papillomavirus (types 16,18)] Bacterial vaginosis and group *B*  
15  
16 115 *Streptococcus* (GBS) colonization data were extracted from the chart and recorded by the  
17  
18 116 investigators. Patient demographics, clinical characteristics, co-infection with other STI and *M.*  
19  
20 117 *genitalium* resistance profiles were summarized by means with standard deviations, or frequencies  
21  
22 118 with percentages. Fisher's exact test or the Wilcoxon Rank Sum test was used to determine  
23  
24 119 differences between women positive and negative for *M. genitalium* in demographic, clinical  
25  
26 120 characteristics, and co-infections with other STIs. Exact 95% confidence intervals (CIs) were  
27  
28 121 determined for the resistance profiles. STROBE guidelines were followed for the study design,  
29  
30 122 methods and analysis<sup>34</sup>. All protected health information was removed from discarded samples  
31  
32 123 prior to shipment and all data was entered into a de-identified database using only study numbers  
33  
34 124 to link information at completion of study.

#### 35 36 37 38 39 125 **Patient and public involvement:**

40  
41  
42 126 There was no patient involved for this study.  
43  
44  
45 127

#### 46 47 128 **Results:**

48  
49 129 During the study period, 726 remnant samples were collected from all pregnant women  
50  
51 130 from the obstetric clinics at Baylor College of Medicine that underwent routine STI testing. Seven  
52  
53 131 samples were inadequate, leaving 719 available for *M. genitalium* testing. Of these, 41 (5.7%)

1  
2  
3 132 were positive. The majority of women in the study group were Hispanic, n= 535 (74.7%) and  
4  
5 133 (72.8%) were multiparous. There were no significant differences in gestational or pre-gestational  
6  
7 134 diabetes, hypertensive disorders in pregnancy and illicit substance use between infected and non-  
8  
9 135 infected women. The demographic and obstetric variables of the study group according to *M.*  
10  
11 136 *genitalium* infection status are demonstrated in Table 1. The mean age of women infected with *M.*  
12  
13 137 *genitalium* was younger than non-infected women (24.9 vs. 28.1 years respectively p = .004) and  
14  
15 138 *M. genitalium* was significantly associated with Black race (p =.003) and Hispanic ethnicity (p =  
16  
17 139 .008). Prevalence rates according to race and ethnicity are shown in Table 2. At the time of sample  
18  
19 140 collection, 12.1% (85/701) reported pelvic complaints (pelvic pain, vaginal discharge or lower  
20  
21 141 abdominal cramping). Seven women with positive results for infection with *M. genitalium* were  
22  
23 142 symptomatic (18%) compared to 78 women who tested negative for *M. genitalium* infection  
24  
25 143 (11.8%; p = .307).

26  
27 144 Table 3 demonstrates the association between *M. genitalium* and co-infection with other  
28  
29 145 STI. *M. genitalium* infection was significantly associated with women co-infected with  
30  
31 146 *Trichomonas vaginalis* (p = <0.001). In addition, the rate of group B *Streptococcus* (GBS)  
32  
33 147 colonization was significantly higher among women infected with *M. genitalium* compared to  
34  
35 148 women who tested negative (58.3% vs. 16.1% respectively p = .002)

36  
37 149 Of the samples with detectable *M. genitalium* RNA, 26 (63.4 %) were of sufficient quantity  
38  
39 150 to undergo conclusive sequencing analysis for azithromycin resistance. Of these, 8 / 26 (30.7%)  
40  
41 151 were found to have 23S rRNA mutations (A2059G) associated with azithromycin resistance. Of  
42  
43 152 the 18 samples that were of sufficient quantity to undergo sequencing analysis for the parC gene  
44  
45 153 mutation, one (5.6%) was found to have the parC (Ser→Asn83) gene mutation. Of the 26 samples  
46  
47 154 that were of sufficient quantity to undergo sequencing analysis for the gyrA gene mutation, one  
48  
49  
50  
51  
52  
53  
54  
55  
56  
57  
58  
59  
60

1  
2  
3 155 (3.8%) was found to have that gene mutation. Both *parC* and *gyrA* gene mutations are associated  
4  
5 156 with moxifloxacin resistance. Both *parC* and *gyrA* gene mutations are associated with  
6  
7  
8 157 moxifloxacin resistance. Sequencing results of all samples are demonstrated in Table 4.  
9  
10  
11 158

## 12 159 **Discussion:**

14  
15 160 Prevalence rates of *M. genitalium* in this large cohort of pregnant women approximate rates  
16  
17 161 reported in non-pregnant women at 5.7%<sup>20-22</sup>. Infection with *M. genitalium* was more prevalent  
18  
19 162 among women at risk for other STI including Black race, young age and co-infection with *T.*  
20  
21 163 *vaginalis* ( $p < .05$  for all). Although macrolide resistance patterns from isolates collected from non-  
22  
23 164 pregnant patients approach 50%, azithromycin resistance was detected in 30% of isolates collected  
24  
25 165 from the cohort and 5.6% demonstrated moxifloxacin resistance<sup>29-33,35</sup>.

26  
27  
28 166 As described in prior studies, infection with *M. genitalium* was found to be more prevalent among  
29  
30  
31 167 pregnant women compared to *N. gonorrhoeae*, where reported prevalence rates in women remain  
32  
33 168 less than 1%<sup>2-10,20-22</sup>. The adverse health impacts of the more common STI, including *N.*  
34  
35 169 *gonorrhoeae*, syphilis, *C. trachomatis*, and herpes simplex virus on pregnant women are well  
36  
37 170 understood<sup>2-10</sup>. These have been studied for decades and standard screening and treatment  
38  
39 171 protocols are practiced nationwide with the support of evidence-based guidelines and  
40  
41 172 recommendations for clinical management<sup>10</sup>. A comparable body of evidence is not available for  
42  
43 173 *M. genitalium*, largely because this organism is relatively understudied as a cause of female genital  
44  
45 174 tract infectious morbidity<sup>6,7,9</sup>. A contributing factor to this paradox is that researchers have been  
46  
47 175 unable to apply many of the same culture-based mechanisms and point-of-care testing often used  
48  
49 176 for the diagnosis of other STI toward detection of *M. genitalium*<sup>11-9</sup>.

1  
2  
3 177 Historically, this organism is extremely challenging to propagate, with few laboratories  
4  
5 178 capable of recovering clinical isolates. With the advent of molecular-based technologies used in  
6  
7  
8 179 research protocols evaluating associations of *M. genitalium* with adverse reproductive outcomes,  
9  
10 180 this organism has been associated with premature birth, premature rupture of membranes,  
11  
12 181 spontaneous abortion, cervicitis and infertility, implicating this organism as a pathogen in pregnant  
13  
14 182 as well as non-pregnant women<sup>11-19, 22-28</sup>. Further understanding of this infection as it relates to  
15  
16  
17 183 pregnancy and adverse perinatal outcomes begins with understanding its characteristics as an STI;  
18  
19 184 its association with obstetrical factors, demographics, co-infection patterns and pelvic  
20  
21 185 symptomatology as described in our analysis.

22  
23  
24 186 A unique finding of this study relates to antimicrobial susceptibility profiles of *M.*  
25  
26 187 *genitalium* isolated from this pregnant cohort. Although detection rates of macrolide resistance  
27  
28 188 determinants approach 30% in our population, published rates of macrolide resistance approach  
29  
30 189 50% in isolates collected from men<sup>29-33,35</sup>. In some countries, strains of multi-drug resistant *M.*  
31  
32 190 *genitalium* strains exist, limiting therapeutic options<sup>29-33,35</sup>. Although the predicted azithromycin  
33  
34 191 resistance is significantly less in this population compared to prior published reports involving  
35  
36 192 men and women, pregnant women remain at significant risk for persistent antenatal infection due  
37  
38 193 to decreased azithromycin susceptibility. The number of cases (n=2) identified with predicted  
39  
40 194 moxifloxacin resistance in this study was low, but it is of concern as extended dose moxifloxacin  
41  
42 195 is currently the only alternative option for treatment of macrolide-resistant *M. genitalium* strains,  
43  
44 196 an option not available to pregnant women due to potential fetal teratogenicity and the assigned  
45  
46 197 pregnancy classification<sup>10,35-38</sup>.

47  
48  
49 198 Data on which to determine whether prenatal treatment of *M. genitalium* can reduce the  
50  
51  
52 199 incidence of pelvic complaints, preterm birth or any other adverse perinatal outcome is still  
53  
54  
55  
56  
57  
58  
59  
60

1  
2  
3 200 lacking. Future research is warranted to examine relationships between mycoplasmas and  
4  
5 201 pregnancy, given that some of these organisms may be mechanistically related in their ability to  
6  
7 202 induce inflammatory cytokines, potentially leading to preterm labor<sup>11-19, 22-28</sup>. This gap in  
8  
9 203 knowledge is a significant impediment for implicating this organism as a notifiable cause of  
10  
11 204 reproductive tract disease, and for evidence-based improvement of the current prenatal STI-  
12  
13 205 screening and treatment guidelines.  
14  
15

16  
17 206 The limitations of our study include the lack of perinatal outcome correlates and a low  
18  
19 207 representation of other STI. Regardless, the co-infection rate of *Trichomonas vaginalis* with *M.*  
20  
21 208 *genitalium* was significant, as was the association of this infection with demographic risk factors  
22  
23 209 common among women with other STI, such as young age and Black race<sup>1-10,20-22</sup>. An additional  
24  
25 210 interesting result is the significantly higher association of group B streptococcal (GBS)  
26  
27 211 colonization in women infected with *M. genitalium*, a relationship worthy of further investigation.  
28  
29 212 Sample processing was an additional limitation to the study. Only 68% of samples contained  
30  
31 213 sufficient material for sequencing for conclusive antibiotic resistance profiling. As these samples  
32  
33 214 were remnant samples that had undergone testing for *N. gonorrhoeae* and *C. trachomatis* prior to  
34  
35 215 *M. genitalium* testing, the potential for a reduction in sample quantity was not unexpected,  
36  
37 216 contributing to lower yields. Further prospective studies involving sample collection for *M.*  
38  
39 217 *genitalium* testing either alone or simultaneously with other STI detected by the Panther  
40  
41 218 transcription - mediated - amplification method would result in higher concentrations of genetic  
42  
43 219 material for sequencing analysis.  
44  
45  
46  
47  
48

49 220

50  
51 221 **Conclusion:**  
52  
53  
54  
55  
56  
57  
58  
59

1  
2  
3 222 Our analysis demonstrates that the prevalence of *M. genitalium* is 5.7% among a large  
4  
5 223 cohort of pregnant women attending prenatal care in an urban academic center. *M. genitalium*  
6  
7 224 shares features of other STI including common demographic risk factors, such as Black race and  
8  
9 225 young age. Of the samples with detectable *M. genitalium* RNA that underwent sequencing, 30%  
10  
11 226 were found to have mutations for resistance to azithromycin. If future studies demonstrate a  
12  
13 227 relationship between *M. genitalium* and adverse perinatal outcomes, alternative therapeutic  
14  
15 228 regimens based on antibiotic susceptibility profiles will need to be determined for the pregnant  
16  
17 229 patient harboring this STI.  
18  
19  
20

21 230 Word Count: 1,863  
22  
23  
24 231

## 232 References

- 233 1. Manhart LE, Holmes KK, Hughes JP, Houston LS, Totten PA. *Mycoplasma genitalium*  
234 among young adults in the United States: an emerging sexually transmitted infection. *Am*  
235 *J Public Health* 2007; 97:1118-25.
- 236 2. McGowin CL, Anderson-Smits C, 2011 *Mycoplasma genitalium*: An emerging cause of  
237 sexually transmitted disease in women. *PLoS Pathog* 7(5):e1001-324.
- 238 3. Seña AC, Lee JY, Schwebke J, Philip SS, Wiesenfeld HC, Rompalo AM, Cook RL, Hobbs  
239 MM. A silent epidemic: the prevalence, incidence and persistence of *Mycoplasma*  
240 *genitalium* among young, asymptomatic high-risk women in the United States. *Clin Infect*  
241 *Dis*. 2018 Jan 12. doi: 10.1093/cid/ciy025
- 242 4. Leli C, Mencacci A, Latino MA, Clerici P, Rassu M, Perito S, Castronari R, Pistoni E,  
243 Luciano E, De Maria D, Morazzoni C, Pascarella M, Bozza S, Sensini A. Prevalence of  
244 cervical colonization by *Ureaplasma parvum*, *Ureaplasma urealyticum*, *Mycoplasma*  
245 *hominis* and *Mycoplasma genitalium* in childbearing age women by a commercially  
246 available multiplex real-time PCR: An Italian observational multicentre study. *J Microbiol*  
247 *Immunol Infect*. 2017 Jun 28. pii: S1684-1182(17)30091-9.
- 248 5. Anagnrius C, Lore B, Jensen JS *Mycoplasma genitalium*: prevalence, clinical significance  
249 and transmission. *Sex Transm Infect* 2005;81:458-462.
- 250 6. Wiesenfeld HC, Manhart LE. *Mycoplasma genitalium* in Women: Current Knowledge and  
251 Research Priorities for This Recently Emerged Pathogen. *J Infect Dis*. 2017 Jul  
252 15;216(suppl\_2):S389-S395. doi: 10.1093/infdis/jix198
- 253 7. Martin DH. *Mycoplasma genitalium* From Basic Science to Public Health Implications:  
254 Results of a National Institute of Allergy and Infectious Diseases Technical Consultation.  
255 *J Infect Dis* 2017(216)suppl 2S381.
- 256 8. McGowin CL, Totten PA The unique microbiology and molecular pathogenesis of  
257 *Mycoplasma genitalium*. *J Infect Dis* 2017;216(suppl2)S382-388.
- 258 9. Manhart LE, Broad JM, Golden MR. *Mycoplasma genitalium*; Should we treat and how?  
259 *Clin Infect Dis* 2011;53(Suppl 3):S129-42.
- 260 10. Centers for Disease Control and Prevention. Sexually Transmitted Diseases Treatment  
261 Guidelines and STD surveillance data 2018, 2015.
- 262 11. Gaydos, C *Mycoplasma genitalium*: accurate diagnosis is necessary for adequate treatment.  
263 *Journal of Infectious dis* 2017(2)S406-11; Yoshida T, Maeda SI, Deguchi T, et al. Rapid  
264 detection of *Mycoplasma genitalium* *Mycoplasma hominis*, *Ureaplasma parvum* and  
265 *Ureaplasma urealyticum*. *J Clin Microbiol* 2003 (41)5:1850-55.
- 266 12. Yoshida T, Maeda SI, Deguchi T, et al. Rapid detection of *Mycoplasma genitalium*  
267 *Mycoplasma hominis*, *Ureaplasma parvum* and *Ureaplasma urealyticum*. *J Clin Microbiol*  
268 2003 (41)5:1850-55.
- 269 13. Munson E, Bykowski H, Munson KL et al. Clinical laboratory assessment of *Mycoplasma*  
270 *genitalium* transcription mediated amplification using primary female urogenital  
271 specimens. *J Clin Microbiol* 2016;54:432-8.
- 272 14. Jensen JS, Uldum SA, Sondergard-Andersen J, et al. Polymerase chain reaction for  
273 detection of *Mycoplasma genitalium* in clinical samples. *J Clin Microbiol* 1991;29:46-50.

- 1  
2  
3 274 15. Jensen JS. Protocol for the detection of *Mycoplasma genitalium* by PCR from clinical  
4 275 specimens and subsequent detection of macrolide resistance-mediating mutations in region  
5 276 V of the 23SrRNA gene. *Method Molec Biol* 2012, 903:129-139.
- 7 277 16. Wroblewski JK, Manhart LE, Dickey KA. Comparison of transcription-mediated  
8 278 amplification and PCR assay results for various genital specimen types for detection of  
9 279 *Mycoplasma genitalium*. *J Clin Microbiol*. 2006; 44:3306-12. doi:10.1128/JCM.00553-06
- 11 280 17. Gaydos CA, Manhart LE, Taylor SN, et al. Molecular Testing for *Mycoplasma*  
12 281 *genitalium* in the United States: Results from the AMES Prospective Multicenter Clinical  
13 282 Study. *J Clin Microbiol*. 2019;57(11):e01125-19. Published 2019 Oct 23.  
14 283 doi:10.1128/JCM.01125-19
- 15 284 18. Jensen JS, Bjornelius E, Dohn B, Lidbrink P. Use of TaqMan5 nuclease real time PCR  
16 285 for quantitative detection of *Mycoplasma genitalium* DNA with and without urethritis  
17 286 who were attendees at a sexually transmitted disease clinic *J Clin Microbiol* 2004(42)  
18 287 683-92.
- 20 288 19. Hardick J, Giles J, Hardick A, Hsieh YH, et al. Performance of the gen-probe  
21 289 transcription-mediated amplification research assay compared to that of a multitarget  
22 290 real-time PCR for *Mycoplasma genitalium* detection. *J Clin Microbiol* 2006(44)1236-40
- 23 291 20. Getman D, Jiang A, O'Donnell M, Cohen S. *Mycoplasma genitalium* prevalence,  
24 292 coinfection and macrolide antibiotic resistance frequency in a multicenter clinical study  
25 293 cohort in the United States. *J Clin Microbiol* 54:2278-83
- 27 294 21. Anagnrius C, Lore B, Jensen JS *Mycoplasma genitalium*: prevalence, clinical significance  
28 295 and transmission. *Sex Transm Infect* 2005;81:458-462.
- 29 296 22. Barreto Campos G, Neves Lobao T, Amorim A, et al. Prevalence of *M. genitalium* and  
30 297 *M. hominis* in urogenital tract of Brazilian women. *BCM Infectious Diseases*,  
31 298 2015(15):60.
- 32 299 23. Larsen B, Hwang J. *Mycoplasma, Ureaplasma*, and adverse pregnancy outcomes: a fresh  
33 300 look. *Infect Dis Obstet Gynecol* 2010; 2010.
- 35 301 24. Trent M, Coleman JS, Hardick J, et al. Biohealth study: Clinical and Sexual Risk  
36 302 Correlates of *Mycoplasma genitalium* in Urban Pregnant and Non-Pregnant Young  
37 303 Women. *J Pediatr Adolesc Gynecol* 2017; 30: 299- 331
- 38 304 25. Rittenschöber-Böhm J, Waldhoer T, Schulz SM, Stihsen B, Pimpel B, Goeral K, Hafner  
39 305 E, Sliutz G, Kasper DC, Witt A, Berger A. First Trimester Vaginal *Ureaplasma* Biovar  
40 306 Colonization and Preterm Birth: Results of a Prospective Multicenter Study. *Neonatology*.  
41 307 2017 Sep 22;113(1):1-6.
- 43 308 26. Averbach SH, Hacker MR, Yiu T, Modest AM, Dimitrakoff J, Ricciotti HA. *Mycoplasma*  
44 309 *genitalium* and preterm delivery at an urban community health center. *Int J Gynaecol*  
45 310 *Obstet* 2013; 123:54-7.
- 46 311 27. Donders GGG, Ruban K, Bellen G, Petricevic L. *Mycoplasma/Ureaplasma* infection in  
47 312 pregnancy: to screen or not to screen. *J Perinat Med*. 2017 Jul 26;45(5):505-515. doi:  
48 313 10.1515/jpm-2016-0111.
- 50 314 28. Lis R, Rowhani-Rahbar A, Manhart LE. *Mycoplasma genitalium* Infection and Female  
51 315 Reproductive Tract Disease: A Meta-analysis. *Clin Infect Dis* 2015; 61:418-26.
- 52 316 29. Horner P, Ingle SM, Garrett F, Blee K, Kong F, Muir P, Moi H. Which azithromycin  
53 317 regimen should be used for treating *Mycoplasma genitalium*, A meta-analysis. *Sex*  
54 318 *Transm Infect*. 2017 Jul 1



- 1  
2  
3 319 30. Lau A, Bradshaw CS, Lewis D, et al. The Efficacy of Azithromycin for the Treatment of  
4 320 Genital *Mycoplasma genitalium*: A Systematic Review and Meta-analysis. Clin Infect  
5 321 Dis. 2015;61(9):1389-99  
6 322  
7 322 31. Shimada Y, Deguchi T, Nakane K, et al. Emergence of clinical strains of *Mycoplasma*  
8 323 *genitalium* harbouring alterations in *ParC* associated with fluoroquinolone resistance. Int  
9 324 J Antimicrob Agent 2010, 36:255-8.  
10 325  
11 325 32. Wikstrøm J, Jensen JS. *Mycoplasma genitalium*: a common cause of persistent urethritis  
12 326 among men treated with doxycycline. Sex Transm Infect. 2006; 82:276-279.  
13 327  
14 327 33. Hilton J, Azariah S, Reid M. A case-control study of men with non-gonococcal urethritis  
15 328 at Auckland Sexual Health Service: rates of detection of *Mycoplasma genitalium*. Sex  
16 329 Health. 2010;7(1):77-81.  
17 330  
18 330 34. Vandembroucke JP, von Elm E, Altman DG, Gøtzsche PC, Mulrow CD, Pocock SJ, et al.  
19 331 (2007) Strengthening the Reporting of Observational Studies in Epidemiology  
20 332 (STROBE): Explanation and Elaboration. PLoS Med 4(10): e29  
21 333  
22 333 35. Deguchi T, Yoshida T, Yokoi S et al. Longitudinal quantitative detection of *Mycoplasma*  
23 334 *genitalium* in first pass urine of men with recurrent non-Gonococcal urethritis. J Clin  
24 335 Microbiol 2002;40:3854-6.  
25 336  
26 336 36. Friedman JM and Polifka JE. Teratogenic Effects of Drugs. A Resource for Clinicians  
27 337 (TERIS). Baltimore, MD: The Johns Hopkins University Press: 2000: 149-195.  
28 338  
29 338 37. Cziezel AE and Rockenbauer M. Teratogenic study of Doxycycline. Obstet  
30 339 Gynecol 1997; 89:524-528.  
31 340  
32 340 38. Horne HW Jr. and Kundsinn RB. The role of mycoplasma among 81 consecutive  
33 341 pregnancies: a prospective study. Int J Fertil 1980; 25:315-317.  
34 342  
35 343  
36 344  
37 345  
38 346  
39 347

Table 1. Demographics and Baseline Obstetrical Characteristics

|                 | <i>M. genitalium</i><br>Positive<br>(N=41) | <i>M. genitalium</i><br>Negative<br>(N=678) | p-value**    | Total<br>Population<br>(N=719) |
|-----------------|--------------------------------------------|---------------------------------------------|--------------|--------------------------------|
| Age, mean (std) | 24.9 (4.89)                                | 28.1 (6.93)                                 | <b>0.004</b> | 27.9 (6.87)                    |
| < 20            | 5 (12.2)                                   | 80 (11.9)                                   | 0.021        | 85 (11.9)                      |
| 20-34           | 35 (85.4)                                  | 462 (68.4)                                  |              | 497 (69.4)                     |
| 35 or more      | 1 (2.4)                                    | 133 (19.7)                                  |              | 134 (18.7)                     |

|                                                                                 |              |               |                                |               |
|---------------------------------------------------------------------------------|--------------|---------------|--------------------------------|---------------|
| Race/ethnicity                                                                  | 41           | 675           | <b>0.003*</b><br><b>0.004^</b> | 716           |
| White/Hispanic                                                                  | 23 (56.1)    | 522 (77.3)    |                                | 545 (76.1)    |
| White/Non-Hispanic                                                              | 4 (9.8)      | 26 (3.9)      |                                | 30 (4.2)      |
| Black/Hispanic                                                                  | 0            | 2 (0.3)       |                                | 2 (0.3)       |
| Black/Non-Hispanic                                                              | 14 (34.2)    | 99 (14.7)     |                                | 113 (15.8)    |
| Other (Asian, Native Hawaiian/Pacific Islander, American Indian/Alaskan Native) | 0            | 21 (3.1)      |                                | 21 (2.9)      |
| Unknown                                                                         | 0            | 5 (0.7)       |                                | 5 (0.7)       |
| Nulliparous                                                                     | 18 (42.9)    | 183 (27.2)    | 0.031                          | 201 (28.2)    |
| Hypertensive disorders of pregnancy                                             | 5/39 (12.8)  | 54/658 (8.2)  | 0.3661                         | 59/697 (8.5)  |
| Diabetes Mellitus (GDM, or pre-gestational DM)                                  | 1/39 (2.6)   | 67/658 (10.2) | 0.1637                         | 68/697 (9.8)  |
| Illicit drug use during pregnancy                                               | 0/38 (0)     | 25/654 (3.8)  | 0.390                          | 25/692 (3.6)  |
| Tobacco use during pregnancy                                                    | 2/38 (5.3)   | 14/655 (2.1)  | 0.2171                         | 16/693 (2.3)  |
| Alcohol use during pregnancy                                                    | 3/38 (7.9)   | 11/652 (1.7)  | 0.0368                         | 14/690 (2.0)  |
| GA at specimen collection, mean (std)                                           | 22.4 (10.90) | 22.2 (10.81)  | 0.816                          | 22.2 (10.81)  |
| Previous Preterm (< 37 wks)                                                     | 2/39 (5.1)   | 63/664 (9.5)  | 0.568                          | 65/703 (9.3)  |
| Previous PROM (< 37 wks)                                                        | 0/39 (0)     | 15/651 (2.3)  | 1.00                           | 15/690 (2.2)  |
| Cervicitis symptoms^^                                                           | 7/39 (18.0)  | 78/662 (11.8) | 0.307                          | 85/701 (12.1) |
| Cerclage in index pregnancy                                                     | 0/39 (0)     | 6/664 (0.9)   | 1.00                           | 6/703 (0.9)   |
| Twin Pregnancy                                                                  | 0/39 (0)     | 9/670 (1.3)   | 1.00                           | 9/709 (1.3)   |

348 Data presented as N (%) unless otherwise specified  
 349 \*p-value compares black vs non-black.  
 350 ^p-value compares Hispanic (including Mexican and unknown) vs. non-Hispanic. \*\*p-value from Fisher's  
 351 exact test or Wilcoxon Rank Sum test.  
 352 ^^Any of the following symptoms: pelvic pressure, vaginal discharge or lower abdominal cramping  
 353 **Bolded** if significantly different

354

355 Table 2: *Mycoplasma genitalium* RNA Detection rates from genital swab collections by

356 Race/Ethnicity

|                                                                                    | <b><i>Detection of Mycoplasma genitalium</i></b><br><b>RNA</b><br><b>[n/N1 (% of subjects)]</b> |
|------------------------------------------------------------------------------------|-------------------------------------------------------------------------------------------------|
| Race/Ethnicity                                                                     |                                                                                                 |
| White/Hispanic                                                                     | 23/545 (4.2)                                                                                    |
| White/Non-Hispanic                                                                 | 4/30 (13.3)                                                                                     |
| Black/Hispanic                                                                     | 0/2 (0)                                                                                         |
| Black/Non-Hispanic                                                                 | 14/113 (12.4)                                                                                   |
| Other (Asian, Native Hawaiian/Pacific<br>Islander, American Indian/Alaskan Native) | 0/21 (0)                                                                                        |
| Race, p-value*                                                                     | 0.003                                                                                           |
| Black                                                                              | 14/115 (12.2)                                                                                   |
| Non-Black                                                                          | 27/601 (4.5)                                                                                    |
| Ethnicity, p-value*                                                                | 0.008                                                                                           |
| Hispanic                                                                           | 23/535 (4.3)                                                                                    |
| Non-Hispanic                                                                       | 18/179 (10.1)                                                                                   |

357 p-value from Fisher's exact test.

358

359 Table 3. Co-Infections with *M. genitalium*

|                                | <i>M. genitalium</i><br>Positive (N=41)<br>n/N1 (%) | <i>M. genitalium</i><br>Negative (N=678)<br>n/N1 (%) | p-value          | Total<br>Population<br>(N=719) |
|--------------------------------|-----------------------------------------------------|------------------------------------------------------|------------------|--------------------------------|
| Human papillomavirus 16,<br>18 | 4/14 (28.6)                                         | 43/281 (15.3)                                        | 0.251            | 47/295 (15.9)                  |
| <i>Bacterial vaginosis</i>     | 5/18 (27.8)                                         | 98/340 (28.8)                                        | 1.000            | 103/255 (28.8)                 |
| <i>Trichomonas vaginalis</i>   | 7/40 (17.5)                                         | 18/677 (2.7)                                         | <b>&lt;0.001</b> | 25/717 (3.5)                   |
| <i>Chlamydia trachomatis</i>   | 6/39 (15.4)                                         | 54/670 (8.1)                                         | 0.131            | 60/709 (8.5)                   |
| <i>Neisseria gonorrhoeae</i>   | 0/39 (0)                                            | 7/670 (1.0)                                          | 1.000            | 7/709 (1.0)                    |
| Hepatitis B                    | 0/39 (0)                                            | 2/637 (0.3)                                          | 1.000            | 2/676 (0.3)                    |
| Hepatitis C                    | 0/17 (0)                                            | 1/281 (0.4)                                          | 1.000            | 1/298 (0.3)                    |
| Syphilis                       | 1/37 (2.7)                                          | 8/639 (1.3)                                          | 0.399            | 9/676 (1.3)                    |
| Herpes Simplex Virus I/II      | 3/6 (50.0)                                          | 23/104 (22.1)                                        | 0.143            | 26/110 (23.6)                  |
| <i>Group B Streptococcus</i>   | 7/12 (58.3)                                         | 40/248 (16.1)                                        | 0.002            | 47/260 (18.1)                  |

360 N1=number of women tested for the infection with a non-missing value. P-value from Fisher's exact test.

361

362

363

364

Table 4. Prevalence of *M. genitalium* and Resistance profiles

|                               | Total (N=726) | 95% CI      |
|-------------------------------|---------------|-------------|
| N with sample tested          | 719           |             |
| <i>M. genitalium</i> positive | 41 (5.7)      | 4.0 - 7.4** |
| 23S                           |               |             |
| A2058G*                       | 3 (7.3)       | 1.5 - 19.9  |
| A2058T*                       | 2 (4.9)       | 0.6 - 16.5  |
| A2059G*                       | 3 (7.3)       | 1.5 - 19.9  |
| No sequence*                  | 15 (36.6)     | 22.1 - 53.1 |
| WT*                           | 18 (43.9)     | 28.5 - 60.3 |

|                                                          |             |               |
|----------------------------------------------------------|-------------|---------------|
| Mutation related to azithromycin resistance <sup>^</sup> | 8/26 (30.8) | 14.3 - 51.8   |
| gyrA                                                     |             |               |
| 95MET(ATG)->ILE(ATC)*                                    | 1 (2.4)     | 0.06 - 12.9   |
| Inconclusive*                                            | 1 (2.4)     | 0.06 - 12.9   |
| No sequence*                                             | 12 (29.3)   | 16.1 - 45.5   |
| WT*                                                      | 25 (60.9)   | 49.4 - 79.9   |
| gyrA mutation <sup>^</sup>                               | 1/26 (3.8)  | 0.09 - 18.4   |
| parC                                                     |             |               |
| 83SER(AGT)->ILE(ATT)*                                    | 1 (2.4)     | 0.06 - 12.9   |
| 83SER(AGT)->ASN(AAT)*                                    | 0           | 0 - 8.6       |
| Inconclusive*                                            | 9 (22.0)    | 10.6 - 37.6   |
| No sequence*                                             | 14 (34.2)   | 20.1 - 50.6   |
| WT <sup>^^</sup>                                         | 17 (41.5)   | 26.3 - 57.9   |
| parC mutation <sup>^</sup>                               | 1/18 (5.6)  | 0.14 - 27.3   |
| <i>M. genitalium</i> Negative                            | 678 (94.3)  | 92.6 - 96.0** |
| <i>M. genitalium</i> positive                            | 1 (5.9)     | 0.15 - 28.7   |
| <i>M. genitalium</i> Negative                            | 16 (94.1)   | 71.3 - 99.9   |

365 Data presented as N (%)

366 \*Percent of positive for *M. genitalium*

367 Exact 95% confidence intervals (CI) except for \*\* which are based on the normal approximation.

368 <sup>^</sup> Denominator is positive samples with conclusive sequencing results

369 <sup>^^</sup> Wild type

370

371

372

373

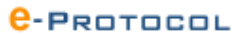

**PROTOCOL**  
**Harris Health Administrative Review**  
**Research Application**  
**Harris Health System**

Protocol # 18-09-2029  
 Date Printed:  
 02/20/2021

---

|    |                                         |    |
|----|-----------------------------------------|----|
| 1  |                                         |    |
| 2  |                                         |    |
| 3  |                                         |    |
| 4  |                                         |    |
| 5  |                                         |    |
| 6  |                                         |    |
| 7  |                                         |    |
| 8  | Continuing Review.....                  | 1  |
| 9  |                                         |    |
| 10 | Personnel Information.....              | 2  |
| 11 |                                         |    |
| 12 | Study Affiliate and Location.....       | 3  |
| 13 |                                         |    |
| 14 |                                         |    |
| 15 | Funding.....                            | 5  |
| 16 |                                         |    |
| 17 | District Resources and Methodology..... | 5  |
| 18 |                                         |    |
| 19 |                                         |    |
| 20 | Recruiting and Advertising.....         | 7  |
| 21 |                                         |    |
| 22 | Informed Consent.....                   | 8  |
| 23 |                                         |    |
| 24 |                                         |    |
| 25 | Attachments.....                        | 9  |
| 26 |                                         |    |
| 27 |                                         |    |
| 28 | Assurance.....                          | 10 |
| 29 |                                         |    |
| 30 | Event History.....                      | 11 |
| 31 |                                         |    |
| 32 |                                         |    |
| 33 |                                         |    |
| 34 |                                         |    |
| 35 |                                         |    |
| 36 |                                         |    |
| 37 |                                         |    |
| 38 |                                         |    |
| 39 |                                         |    |
| 40 |                                         |    |
| 41 |                                         |    |
| 42 |                                         |    |
| 43 |                                         |    |
| 44 |                                         |    |
| 45 |                                         |    |
| 46 |                                         |    |
| 47 |                                         |    |
| 48 |                                         |    |
| 49 |                                         |    |
| 50 |                                         |    |
| 51 |                                         |    |
| 52 |                                         |    |
| 53 |                                         |    |
| 54 |                                         |    |
| 55 |                                         |    |
| 56 |                                         |    |
| 57 |                                         |    |
| 58 |                                         |    |
| 59 |                                         |    |
| 60 |                                         |    |

**Protocol Title:** H-44123: A Point Prevalence Study of Mycoplasma Genitalium among Pregnant Women in Houston, TX

**Protocol Type:** Harris Health Administrative Review Research Application

**Date Submitted:** 05/29/2020

**Approval Period:** 07/13/2020-06/16/2021

**Important Note:** This Print View may not reflect all comments and contingencies for approval. Please check the comments section of the online protocol. Questions that appear to not have been answered may not have been required for this submission. Please see the system application for more details.

\*\*\* Continuing Review \*\*\*

Continuing Review

- 1) Is this the submission of translated Spanish consent documents following the initial 3-month approval period? If yes, please upload the IRB-approved documents in the Attachments section. N

If this is the submission of your annual continuing review, please answer the following questions and upload your IRB renewal documents in the Attachments section.

- i. Is recruitment active? N  
If no, why should study remain active?

- ii. Have changes been made since last approval? Y

If yes, indicate specific changes and upload the IRB approval letter in the Attachments section.

There was a change in PI during the study period. Dr. Stafford has now been made a Co-Investigator from the UT Health Science Center in Houston. The study now includes UT Health Science Center, however no specimen collection will occur here.

- iii. Total number of Harris Health System participants or patient records reviewed? 1300

- iv. Total number of Harris Health System participants enrolled or patient records reviewed since last approval? 1300

- v. Please provide a summary of any interim findings and/or publication citations since last approval.

We observed a high percentage of Group B Streptococcus (GBS) positive patients that were also M. genitalium positive. Of the STI studied, this and Trichomonas vaginalis (T. vaginalis) demonstrated the highest statistically significance with M. genitalium infection. Our risk/benefit ratio remains low as there is no increase to patient risk with continued chart reviewing and this information will continue to be de-identified and not linked to the patient's chart. However, the knowledge we can obtain from this study in regards to prevalence and pregnancy in relation to M. genitalium would be high given the number of patients and the fact that this infection has not be heavily studied in this population.

- vi. Any serious adverse events reported? N  
If yes, please describe

**PROTOCOL**  
**Harris Health Administrative Review**  
**Research Application**  
**Harris Health System**

Protocol # 18-09-2029  
 Date Printed: 02/20/2021

**Protocol Title:** H-44123: A Point Prevalence Study of Mycoplasma Genitalium among Pregnant Women in Houston, TX

**Protocol Type:** Harris Health Administrative Review Research Application

**Date Submitted:** 05/29/2020

**Approval Period:** 07/13/2020-06/16/2021

**Important Note:** This Print View may not reflect all comments and contingencies for approval. Please check the comments section of the online protocol. Questions that appear to not have been answered may not have been required for this submission. Please see the system application for more details.

-----

Please upload all IRB renewal documents in the Attachments section (e.g. approval letter, updated consent documents).

-----

**\*\*\* Personnel Information \*\*\***

**Principal Investigator**

Harris Health System defines "investigator" as an individual who conducts a research study. If the study is conducted by a team of individuals, the investigator is the responsible leader of the team (21 CFR 312.3[b]). Also referred to as the principal investigator.

| Name of Principal Investigator | Degree (MD/PhD) | Title            |
|--------------------------------|-----------------|------------------|
| Kenneth Muldrew                | MD, MPH         | Medical Director |
| Email                          | Phone           | Fax              |
| muldrew@bcm.edu                | 615-429-6825    |                  |
| Department                     | Mailing Address |                  |
| Pathology/Lab                  |                 |                  |

Is this personnel credentialed/authorized by Harris Health System to perform Y the procedure(s) required for this study and been assigned a Harris Health provider number? If you answered no, please contact Monique Okeke at Monique.Okeke@harrishealth.org.

**Study Coordinator (edit access)**

Harris Health System defines a "study coordinator" as an individual who assists the investigator in the conduct of research.

| Name of Study Coordinator | Degree (MD/PhD) | Title |
|---------------------------|-----------------|-------|
| Irene Stafford            |                 |       |
| Email                     | Phone           | Fax   |
| petrouia@yahoo.com        |                 |       |
| Department                | Mailing Address |       |
| Obstetrics/Gynecology     |                 |       |



e-PROTOCOL

**PROTOCOL**  
**Harris Health Administrative Review**  
**Research Application**  
**Harris Health System**

Protocol # 18-09-2029  
Date Printed: 02/20/2021

**Protocol Title:** H-44123: A Point Prevalence Study of Mycoplasma Genitalium among Pregnant Women in Houston, TX

**Protocol Type:** Harris Health Administrative Review Research Application

**Date Submitted:** 05/29/2020

**Approval Period:** 07/13/2020-06/16/2021

**Important Note:** This Print View may not reflect all comments and contingencies for approval. Please check the comments section of the online protocol. Questions that appear to not have been answered may not have been required for this submission. Please see the system application for more details.

Is this personnel credentialed/authorized by Harris Health System to perform Y the procedure(s) required for this study and been assigned a Harris Health contractor number? If you answered no, please contact Monique Okeke at Monique.Okeke@harrishealth.org.

#### Additional Personnel

| Name of Additional Personnel | Degree | Title           | Department                      |
|------------------------------|--------|-----------------|---------------------------------|
| Elizabeth Kravitz            |        | Medical Student | Obstetrics/Gynecology           |
| Soumya Gogia                 | BA     |                 | Research and Sponsored Programs |
| Mary Fang                    |        | Medical Student | Other                           |
| Savannah Bryce               | BS     | medical student | Obstetrics/Gynecology           |
| Kelsey Hummel                |        |                 | Pathology/Lab                   |

\* \* \* Study Affiliate and Location \* \* \*

#### Study Affiliate and Location

Please select your Harris Health System affiliate institution:

Please attach affiliate IRB approval letter in Attachments section.

- Baylor College of Medicine
- UTHealth - Houston
  - MD Anderson Cancer Center
  - Texas Woman's University
  - Prairie View A&M University
  - University of Houston
  - University of Houston - Clearlake
  - University of Texas Medical Branch - Galveston
- Harris Health System
- Other

**STUDY LOCATION** (we strongly recommend that you discuss this study with applicable Unit/Health Center representatives) (Check all that apply)

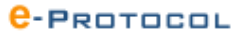

**PROTOCOL**  
**Harris Health Administrative Review**  
**Research Application**  
**Harris Health System**

Protocol # 18-09-2029  
 Date Printed: 02/20/2021

**Protocol Title:** H-44123: A Point Prevalence Study of Mycoplasma Genitalium among Pregnant Women in Houston, TX

**Protocol Type:** Harris Health Administrative Review Research Application

**Date Submitted:** 05/29/2020

**Approval Period:** 07/13/2020-06/16/2021

**Important Note:** This Print View may not reflect all comments and contingencies for approval. Please check the comments section of the online protocol. Questions that appear to not have been answered may not have been required for this submission. Please see the system application for more details.

- X Ben Taub General Hospital  
 Unit/Specific Clinic(s) Pathology
- Lyndon B. Johnson General Hospital  
 Unit/Specific Clinic(s)
- Quentin Mease Hospital  
 Unit/Specific Clinic(s)
- The Ambulatory Surgery Center (ACS) at LBJ  
 Thomas Street Health Center  
 Acres Home Health Center  
 Aldine Health Center  
 Baytown Health Center  
 Casa De Amigos Health Center  
 Gulfgate Health Center  
 MLK Health Center  
 Northwest Health Center  
 Vallbona Health Center  
 Settegast Health Center  
 E.A. Squatty Lyons Health Center  
 Strawberry Health Center  
 School Based Clinics  
 Unit/Specific Clinic(s)
- Homeless Clinics  
 Unit/Specific Clinic(s)
- El Franco Lee Health Center  
 Dental Center  
 Riverside Dialysis Center  
 Smith Clinic  
 Unit/Specific Clinic(s)

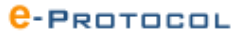

**PROTOCOL**  
**Harris Health Administrative Review**  
**Research Application**  
**Harris Health System**

Protocol # 18-09-2029  
Date Printed: 02/20/2021

**Protocol Title:** H-44123: A Point Prevalence Study of Mycoplasma Genitalium among Pregnant Women in Houston, TX  
**Protocol Type:** Harris Health Administrative Review Research Application  
**Date Submitted:** 05/29/2020  
**Approval Period:** 07/13/2020-06/16/2021  
**Important Note:** This Print View may not reflect all comments and contingencies for approval. Please check the comments section of the online protocol. Questions that appear to not have been answered may not have been required for this submission. Please see the system application for more details.

\*\*\* Funding \*\*\*

NONE--This project does not have any external funding. If you want to add funding for the study, please uncheck "NONE."

**Funding**

Add external funding source(s) below: Sponsor, Federal, or Other. Select "None" above if there is no external funding for the study.

**Commercial**

|                                               |
|-----------------------------------------------|
| <b>Sponsor Name</b>                           |
| Hologic Corp, Marlborough, MA: Please specify |

\*\*\* District Resources and Methodology \*\*\*

**Harris Health System Resources and Methodology**

|                                                                                                |
|------------------------------------------------------------------------------------------------|
| <b>Study Title</b>                                                                             |
| H-44123: A Point Prevalence Study of Mycoplasma Genitalium among Pregnant Women in Houston, TX |

**Study Information**

Please attach affiliate IRB application/summary in Attachments section.

**Affiliate IRB Protocol Number:** H-44123



**PROTOCOL**  
**Harris Health Administrative Review**  
**Research Application**  
**Harris Health System**

Protocol # 18-09-2029  
 Date Printed: 02/20/2021

**Protocol Title:** H-44123: A Point Prevalence Study of Mycoplasma Genitalium among Pregnant Women in Houston, TX  
**Protocol Type:** Harris Health Administrative Review Research Application  
**Date Submitted:** 05/29/2020  
**Approval Period:** 07/13/2020-06/16/2021  
**Important Note:** This Print View may not reflect all comments and contingencies for approval. Please check the comments section of the online protocol. Questions that appear to not have been answered may not have been required for this submission. Please see the system application for more details.

**Sample Size: (Harris Health participants ONLY)** 1300

**1. Harris Health System Resources**

**Will any Harris Health resources or services be utilized for research purposes?** Y

Indicate which of the following services will be used for research-specific procedures only. Select all that apply.

- Investigational Drug Services
- X  Pathology/Laboratory Services
  - a. Data Report Search
  - X  b. Block/Slide/Sample Retrieval
  - c. Stain/Test or Procedure
  - d. Other
- 
- Nursing Service
- Radiology Service
- Patient data provided by Information Technology (IT). Email [research@harrishealth.org](mailto:research@harrishealth.org) to request an IT Research Report Request.
- Nuclear Medicine Service
- Health Information Management (Chart Review)
- Other (specify):

**2. Methodology**

Please check here if the protocol does not involve patient care or clinical interventions (e.g. medical record review, employee survey research).

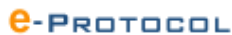

**PROTOCOL**  
**Harris Health Administrative Review**  
**Research Application**  
**Harris Health System**

Protocol # 18-09-2029  
Date Printed: 02/20/2021

**Protocol Title:** H-44123: A Point Prevalence Study of Mycoplasma Genitalium among Pregnant Women in Houston, TX  
**Protocol Type:** Harris Health Administrative Review Research Application  
**Date Submitted:** 05/29/2020  
**Approval Period:** 07/13/2020-06/16/2021  
**Important Note:** This Print View may not reflect all comments and contingencies for approval. Please check the comments section of the online protocol. Questions that appear to not have been answered may not have been required for this submission. Please see the system application for more details.

a) Specify which protocol procedures and/or tests are considered routine clinical care and will be billed to the patient or insurance.

Nothing will be billed to the patient on insurance. We will be testing residual, otherwise discarded urogenital samples from pregnant women that have been stored..

b) Specify which protocol procedures and/or tests are being done solely for research purposes using Harris Health resources. Items included here will be included in the Harris Health financial agreement and reimbursed by the study sponsor. If a coverage analysis has been completed, please upload a copy in the Attachments section.

We will be using previously analyzed and stored urogenital samples (Hologic NG/CT NAAT) collected from pregnant women at Ben Taub between July 1, 2020 and June 30, 2021. These samples will be de-identified, assigned a study identification number, and shipped to Dr. Erik Munson with the Clinical Laboratory Science department in the College of Health Sciences, Marquette University, Milwaukee, WI for M. genitalium testing using the Hologic transcription-mediated amplification (TMA) Panther system.

No costs will be accrued at Ben Taub hospital. We will be collecting stored samples with the help of pathologists Drs. Dunn-Urbonas and Muldrew. The PI will de-identify, label, and ship samples to Marquette University. Hologic corp will be providing all reagents and supplies to Dr. Erik Munson to test the samples using the TMA Panther system.

The PI will be accessing patient's medical records to record limited demographic data including age, race, ethnicity, parity, and STI coinfection.

**\*\*\* Recruiting and Advertising \*\*\***

**3. Recruitment and Advertising**

Are you requesting access to Harris Health facilities for recruitment purposes ONLY (e.g. N posting of flyers, screening medical records)? Patients will be required to undergo all research interventions, including the process of informed consent, at an off-site, non-Harris Health location.

Are you requesting approval to post recruitment flyers in a Harris Health System facility? If N

PROTOCOL  
Harris Health Administrative Review  
Research Application  
Harris Health System

Protocol # 18-09-2029  
Date Printed: 02/20/2021

**Protocol Title:** H-44123: A Point Prevalence Study of Mycoplasma Genitalium among Pregnant Women in Houston, TX

**Protocol Type:** Harris Health Administrative Review Research Application

**Date Submitted:** 05/29/2020

**Approval Period:** 07/13/2020-06/16/2021

**Important Note:** This Print View may not reflect all comments and contingencies for approval. Please check the comments section of the online protocol. Questions that appear to not have been answered may not have been required for this submission. Please see the system application for more details.

yes, a copy of the flyer must be uploaded in the Attachments section and will be stamped with the Harris Health approval.

In the Attachments section, please attach a copy of all subject recruitment materials that will be used to recruit Harris Health System patients.

\*\*\* Informed Consent \*\*\*

#### 4. Informed Consent

If your protocol involves a physical intervention that may incur research-related injuries, the injury disclaimer below MUST be included in the English and Spanish consent documents. Your application will be returned if the disclaimer is not present.

"In the event of injury resulting from this research, (your institution) and/or the Harris Health System (name of Harris Health facility or facilities) are not able to offer financial compensation nor to absorb the costs of medical treatment. However, necessary facilities, emergency treatment and professional services will be available to you, just as they are to the general community."

- a) Will WRITTEN informed consent be obtained from participants in this study? N
- b) Will patients who only speak Spanish be included in this study? Please note, it is Harris Health policy that this population be included unless there is a scientific rationale to exclude them.  
If no, please provide a scientific rationale for excluding this population.

Are foreign language consent forms, other than Spanish, being used for this study? (e.g. Arabic, Chinese, Vietnamese)?

In the Attachments section, please upload all IRB-approved informed consent documents.

For studies enrolling Spanish-speaking only participants, please ensure a translated full Spanish consent

**PROTOCOL**  
**Harris Health Administrative Review**  
**Research Application**  
**Harris Health System**

Protocol # 18-09-2029  
Date Printed: 02/20/2021

**Protocol Title:** H-44123: A Point Prevalence Study of Mycoplasma Genitalium among Pregnant Women in Houston, TX

**Protocol Type:** Harris Health Administrative Review Research Application

**Date Submitted:** 05/29/2020

**Approval Period:** 07/13/2020-06/16/2021

**Important Note:** This Print View may not reflect all comments and contingencies for approval. Please check the comments section of the online protocol. Questions that appear to not have been answered may not have been required for this submission. Please see the system application for more details.

document is uploaded in the Attachments section. If the Spanish consent document is pending approval by the affiliate IRB, Harris Health will grant a 3-month approval, at which time submission of the translated document is required for continued approval.

\* \* \* Attachments \* \* \*

## 5. Attachments

Please attach the below items, if applicable.

- Affiliate IRB approval letter
- Affiliate IRB protocol summary/application
- Affiliate IRB-approved consent forms (all languages)
- Information Technology Research Report Request
- Subject recruitment materials used to recruit Harris Health System patients

| Type                              | Attachment Name                                    | Attached Date | Submitted Date |
|-----------------------------------|----------------------------------------------------|---------------|----------------|
| Affiliate IRB application         | H-44123 IRB application                            | 09/24/2018    | 09/24/2018     |
| Affiliate IRB approval letter     | Amendment Letter - IRB approval                    | 09/24/2018    | 09/24/2018     |
| Affiliate IRB approval letter     | Human Approval Letter                              | 09/24/2018    | 09/24/2018     |
| Harris Health Financial Agreement | H-44123 Irene Stafford Financial Agreement 9-27-18 | 09/27/2018    | 09/27/2018     |
| Affiliate IRB approval letter     | Human Approval Letter_asp                          | 09/11/2019    | 02/10/2020     |
| Affiliate IRB approval letter     | Consent Waiver Memorandum                          | 05/23/2020    | 05/29/2020     |
| Affiliate IRB approval letter     | Human Amendment Information                        | 05/23/2020    | 05/29/2020     |
| Affiliate IRB approval letter     | Amendment Letter                                   | 05/23/2020    | 05/29/2020     |
| Affiliate IRB approval letter     | Human Approval Letter_2020                         | 05/23/2020    | 05/29/2020     |

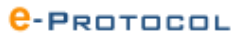

**PROTOCOL**  
**Harris Health Administrative Review**  
**Research Application**  
**Harris Health System**

Protocol # 18-09-2029  
 Date Printed: 02/20/2021

**Protocol Title:** H-44123: A Point Prevalence Study of Mycoplasma Genitalium among Pregnant Women in Houston, TX

**Protocol Type:** Harris Health Administrative Review Research Application

**Date Submitted:** 05/29/2020

**Approval Period:** 07/13/2020-06/16/2021

**Important Note:** This Print View may not reflect all comments and contingencies for approval. Please check the comments section of the online protocol. Questions that appear to not have been answered may not have been required for this submission. Please see the system application for more details.

|                               |                                                            |            |            |
|-------------------------------|------------------------------------------------------------|------------|------------|
| Affiliate IRB approval letter | Human Protocol Report_2020                                 | 05/29/2020 | 05/29/2020 |
| Affiliate IRB approval letter | MGen Study Renewal 7_7_20-6_16_21_baylor approval letter   | 07/10/2020 | 07/10/2020 |
| Affiliate IRB application     | MGen Study Renewal 7_7_20-6_16_21_baylor approved protocol | 07/10/2020 | 07/10/2020 |

\*\*\* Assurance \*\*\*

**Assurance**

The Principal Investigator of this study provides the following assurances:

The eProtocol application submitted for this study is complete and accurate.

The PI acknowledges responsibility for the conduct of this project as described in the Harris Health System Administrative Review application.

The PI has evaluated the protocol and determined that s/he has sufficient resources to conduct the study as submitted and necessary to protect subjects who enroll in the study.

All co- or sub-investigators, study coordinators, and other research personnel to whom the PI delegates study-related responsibilities will receive thorough training in human subjects protections as well as in the specific details of study procedures.

The PI will not begin the study until s/he has received notification of final Harris Health System Administrative approval.

The PI acknowledges his/her responsibility for the accuracy of all documents submitted to the Harris Health System Office of Research on his/her behalf.

The PI will comply with all Harris Health System Office of Research requests regarding the status of the study.

The PI will seek and obtain Harris Health System Administrative approval for all study modifications.

The PI will promptly report any unexpected or otherwise significant adverse events or unanticipated problems or incidents that may occur in the course of this study.



**PROTOCOL**  
**Harris Health Administrative Review**  
**Research Application**  
**Harris Health System**

Protocol # 18-09-2029  
 Date Printed: 02/20/2021

**Protocol Title:** H-44123: A Point Prevalence Study of Mycoplasma Genitalium among Pregnant Women in Houston, TX

**Protocol Type:** Harris Health Administrative Review Research Application

**Date Submitted:** 05/29/2020

**Approval Period:** 07/13/2020-06/16/2021

**Important Note:** This Print View may not reflect all comments and contingencies for approval. Please check the comments section of the online protocol. Questions that appear to not have been answered may not have been required for this submission. Please see the system application for more details.

The PI will notify the Harris Health System Office of Research when his/her research has been completed or terminated.

X The Principal Investigator has read and agrees to abide by the above obligations.

Please click on the 'Check for Completeness' button in the left navigation to check if your application is complete.

\* \* \* Event History \* \* \*

**Event History**

| Date       | Status                                    | View Attachments | Letters |
|------------|-------------------------------------------|------------------|---------|
| 09/24/2018 | NEW FORM CREATED                          |                  |         |
| 09/24/2018 | NEW FORM SUBMITTED                        | Y                |         |
| 09/24/2018 | NEW FORM PANEL ASSIGNED                   |                  |         |
| 09/24/2018 | NEW FORM REVIEWER(S) ASSIGNED             |                  |         |
| 09/27/2018 | NEW FORM SUBMITTED (CYCLE 1)              | Y                |         |
| 09/28/2018 | NEW FORM APPROVED                         | Y                | Y       |
| 09/05/2019 | PROTOCOL EXPIRED                          |                  |         |
| 09/11/2019 | CONTINUING REVIEW 1 FORM CREATED          |                  |         |
| 09/11/2019 | CONTINUING REVIEW 1 FORM SUBMITTED        | Y                |         |
| 09/11/2019 | CONTINUING REVIEW 1 FORM PANEL REASSIGNED |                  |         |
| 09/17/2019 | CONTINUING REVIEW 1 FORM APPROVED         | Y                | Y       |
| 02/10/2020 | AMENDMENT 1 FORM CREATED                  |                  |         |

PROTOCOL  
Harris Health Administrative Review  
Research Application  
Harris Health System

Protocol # 18-09-2029  
Date Printed: 02/20/2021

**Protocol Title:** H-44123: A Point Prevalence Study of Mycoplasma Genitalium among Pregnant Women in Houston, TX

**Protocol Type:** Harris Health Administrative Review Research Application

**Date Submitted:** 05/29/2020

**Approval Period:** 07/13/2020-06/16/2021

**Important Note:** This Print View may not reflect all comments and contingencies for approval. Please check the comments section of the online protocol. Questions that appear to not have been answered may not have been required for this submission. Please see the system application for more details.

---

|            |                                      |   |   |
|------------|--------------------------------------|---|---|
| 02/10/2020 | AMENDMENT 1 FORM SUBMITTED           | Y |   |
| 02/10/2020 | AMENDMENT 1 FORM APPROVED            | Y | Y |
| 02/18/2020 | AMENDMENT 2 FORM CREATED             |   |   |
| 04/03/2020 | AMENDMENT 2 FORM SUBMITTED           | Y |   |
| 04/03/2020 | AMENDMENT 2 FORM APPROVED            | Y | Y |
| 04/23/2020 | CONTINUING REVIEW 2 FORM CREATED     |   |   |
| 05/29/2020 | CONTINUING REVIEW 2 FORM SUBMITTED   | Y |   |
| 06/09/2020 | CONTINUING REVIEW 2 FORM RETURNED    |   |   |
| 07/10/2020 | CONTINUING REVIEW 2 FORM RESUBMITTED | Y |   |
| 07/14/2020 | CONTINUING REVIEW 2 FORM APPROVED    | Y | Y |

STROBE Statement—Checklist of items that should be included in reports of *cohort studies*

|                              | Item No | Recommendation                                                                                                                                                                                                                                                                                                         | Page No  |
|------------------------------|---------|------------------------------------------------------------------------------------------------------------------------------------------------------------------------------------------------------------------------------------------------------------------------------------------------------------------------|----------|
| <b>Title and abstract</b>    | 1       | (a) Indicate the study's design with a commonly used term in the title or the abstract<br>(b) Provide in the abstract an informative and balanced summary of what was done and what was found                                                                                                                          | 1<br>2-3 |
| <b>Introduction</b>          |         |                                                                                                                                                                                                                                                                                                                        |          |
| Background/rationale         | 2       | Explain the scientific background and rationale for the investigation being reported                                                                                                                                                                                                                                   | 3        |
| Objectives                   | 3       | State specific objectives, including any prespecified hypotheses                                                                                                                                                                                                                                                       | 4        |
| <b>Methods</b>               |         |                                                                                                                                                                                                                                                                                                                        |          |
| Study design                 | 4       | Present key elements of study design early in the paper                                                                                                                                                                                                                                                                | 4        |
| Setting                      | 5       | Describe the setting, locations, and relevant dates, including periods of recruitment, exposure, follow-up, and data collection                                                                                                                                                                                        | 4-6      |
| Participants                 | 6       | (a) Give the eligibility criteria, and the sources and methods of selection of participants. Describe methods of follow-up<br>(b) For matched studies, give matching criteria and number of exposed and unexposed                                                                                                      | 4-6      |
| Variables                    | 7       | Clearly define all outcomes, exposures, predictors, potential confounders, and effect modifiers. Give diagnostic criteria, if applicable                                                                                                                                                                               | 4-6      |
| Data sources/<br>measurement | 8*      | For each variable of interest, give sources of data and details of methods of assessment (measurement). Describe comparability of assessment methods if there is more than one group                                                                                                                                   | 4-6      |
| Bias                         | 9       | Describe any efforts to address potential sources of bias                                                                                                                                                                                                                                                              | 4-6      |
| Study size                   | 10      | Explain how the study size was arrived at                                                                                                                                                                                                                                                                              | 4-6      |
| Quantitative variables       | 11      | Explain how quantitative variables were handled in the analyses. If applicable, describe which groupings were chosen and why                                                                                                                                                                                           | 4-6      |
| Statistical methods          | 12      | (a) Describe all statistical methods, including those used to control for confounding<br>(b) Describe any methods used to examine subgroups and interactions<br>(c) Explain how missing data were addressed<br>(d) If applicable, explain how loss to follow-up was addressed<br>(e) Describe any sensitivity analyses | 4-6      |
| <b>Results</b>               |         |                                                                                                                                                                                                                                                                                                                        |          |
| Participants                 | 13*     | (a) Report numbers of individuals at each stage of study—eg numbers potentially eligible, examined for eligibility, confirmed eligible, included in the study, completing follow-up, and analysed<br>(b) Give reasons for non-participation at each stage<br>(c) Consider use of a flow diagram                        | 6-7      |
| Descriptive data             | 14*     | (a) Give characteristics of study participants (eg demographic, clinical, social) and information on exposures and potential confounders<br>(b) Indicate number of participants with missing data for each variable of interest<br>(c) Summarise follow-up time (eg, average and total amount)                         | 6-7      |
| Outcome data                 | 15*     | Report numbers of outcome events or summary measures over time                                                                                                                                                                                                                                                         | 6-7      |

|    |                          |                                                                                                                  |                                                                                                                                                                                                              |      |
|----|--------------------------|------------------------------------------------------------------------------------------------------------------|--------------------------------------------------------------------------------------------------------------------------------------------------------------------------------------------------------------|------|
| 1  | Main results             | 16                                                                                                               | (a) Give unadjusted estimates and, if applicable, confounder-adjusted estimates and their precision (eg, 95% confidence interval). Make clear which confounders were adjusted for and why they were included | 6-7  |
| 2  |                          | (b) Report category boundaries when continuous variables were categorized                                        |                                                                                                                                                                                                              |      |
| 3  |                          | (c) If relevant, consider translating estimates of relative risk into absolute risk for a meaningful time period |                                                                                                                                                                                                              |      |
| 4  | Other analyses           | 17                                                                                                               | Report other analyses done—eg analyses of subgroups and interactions, and sensitivity analyses                                                                                                               |      |
| 5  | <b>Discussion</b>        |                                                                                                                  |                                                                                                                                                                                                              |      |
| 6  | Key results              | 18                                                                                                               | Summarise key results with reference to study objectives                                                                                                                                                     | 7-10 |
| 7  | Limitations              | 19                                                                                                               | Discuss limitations of the study, taking into account sources of potential bias or imprecision. Discuss both direction and magnitude of any potential bias                                                   | 7-10 |
| 8  | Interpretation           | 20                                                                                                               | Give a cautious overall interpretation of results considering objectives, limitations, multiplicity of analyses, results from similar studies, and other relevant evidence                                   | 7-10 |
| 9  | Generalisability         | 21                                                                                                               | Discuss the generalisability (external validity) of the study results                                                                                                                                        | 10   |
| 10 | <b>Other information</b> |                                                                                                                  |                                                                                                                                                                                                              |      |
| 11 | Funding                  | 22                                                                                                               | Give the source of funding and the role of the funders for the present study and, if applicable, for the original study on which the present article is based                                                | N/a  |

\*Give information separately for exposed and unexposed groups.

**Note:** An Explanation and Elaboration article discusses each checklist item and gives methodological background and published examples of transparent reporting. The STROBE checklist is best used in conjunction with this article (freely available on the Web sites of PLoS Medicine at <http://www.plosmedicine.org/>, Annals of Internal Medicine at <http://www.annals.org/>, and Epidemiology at <http://www.epidem.com/>). Information on the STROBE Initiative is available at <http://www.strobe-statement.org>.

# BMJ Open

## A retrospective analysis of infection and antimicrobial resistance patterns of *Mycoplasma genitalium* among pregnant women in the southwestern United States

|                                 |                                                                                                                                                                                                                                                                                                                                                                                                                                                                                                                                                                                                                                                                                                                   |
|---------------------------------|-------------------------------------------------------------------------------------------------------------------------------------------------------------------------------------------------------------------------------------------------------------------------------------------------------------------------------------------------------------------------------------------------------------------------------------------------------------------------------------------------------------------------------------------------------------------------------------------------------------------------------------------------------------------------------------------------------------------|
| Journal:                        | <i>BMJ Open</i>                                                                                                                                                                                                                                                                                                                                                                                                                                                                                                                                                                                                                                                                                                   |
| Manuscript ID                   | bmjopen-2021-050475.R1                                                                                                                                                                                                                                                                                                                                                                                                                                                                                                                                                                                                                                                                                            |
| Article Type:                   | Original research                                                                                                                                                                                                                                                                                                                                                                                                                                                                                                                                                                                                                                                                                                 |
| Date Submitted by the Author:   | 27-Apr-2021                                                                                                                                                                                                                                                                                                                                                                                                                                                                                                                                                                                                                                                                                                       |
| Complete List of Authors:       | Stafford, Irene; The University of Texas Health Science Center at Houston, Department of Obstetrics and Gynecology<br>Hummel, Kelsey; Baylor College of Medicine, Department of Pathology and Immunology<br>Dunn, James J.; Baylor College of Medicine, Department of Pathology and Immunology<br>Muldrew, Kenneth; Baylor College of Medicine, Department of Pathology and Immunology<br>Berra, Alexandra; Baylor College of Medicine, Obstetrics and Gynecology<br>Kravitz, Elizabeth; Baylor College of Medicine, Obstetrics and Gynecology<br>Gogia, Soumya; Baylor College of Medicine,<br>Martin, Irene; Public Health Agency of Canada,<br>Munson, Erik; Marquette University, Clinical Laboratory Science |
| <b>Primary Subject Heading</b>: | Obstetrics and gynaecology                                                                                                                                                                                                                                                                                                                                                                                                                                                                                                                                                                                                                                                                                        |
| Secondary Subject Heading:      | Infectious diseases, Sexual health                                                                                                                                                                                                                                                                                                                                                                                                                                                                                                                                                                                                                                                                                |
| Keywords:                       | BACTERIOLOGY, Reproductive medicine < GYNAECOLOGY, INFECTIOUS DISEASES, Maternal medicine < OBSTETRICS, OBSTETRICS                                                                                                                                                                                                                                                                                                                                                                                                                                                                                                                                                                                                |
|                                 |                                                                                                                                                                                                                                                                                                                                                                                                                                                                                                                                                                                                                                                                                                                   |

SCHOLARONE™  
Manuscripts



I, the Submitting Author has the right to grant and does grant on behalf of all authors of the Work (as defined in the below author licence), an exclusive licence and/or a non-exclusive licence for contributions from authors who are: i) UK Crown employees; ii) where BMJ has agreed a CC-BY licence shall apply, and/or iii) in accordance with the terms applicable for US Federal Government officers or employees acting as part of their official duties; on a worldwide, perpetual, irrevocable, royalty-free basis to BMJ Publishing Group Ltd ("BMJ") its licensees and where the relevant Journal is co-owned by BMJ to the co-owners of the Journal, to publish the Work in this journal and any other BMJ products and to exploit all rights, as set out in our [licence](#).

The Submitting Author accepts and understands that any supply made under these terms is made by BMJ to the Submitting Author unless you are acting as an employee on behalf of your employer or a postgraduate student of an affiliated institution which is paying any applicable article publishing charge ("APC") for Open Access articles. Where the Submitting Author wishes to make the Work available on an Open Access basis (and intends to pay the relevant APC), the terms of reuse of such Open Access shall be governed by a Creative Commons licence – details of these licences and which [Creative Commons](#) licence will apply to this Work are set out in our licence referred to above.

Other than as permitted in any relevant BMJ Author's Self Archiving Policies, I confirm this Work has not been accepted for publication elsewhere, is not being considered for publication elsewhere and does not duplicate material already published. I confirm all authors consent to publication of this Work and authorise the granting of this licence.

1 **A retrospective analysis of infection and antimicrobial resistance patterns of *Mycoplasma***  
2 ***genitalium* among pregnant women in the southwestern United States**

3 Irene A. Stafford MD<sup>1</sup> irene.stafford@uth.tmc.edu, Kelsey Hummel MD<sup>2</sup>,  
4 Kelsey.hummel@bcm.edu, James J. Dunn PhD<sup>2</sup> jjdunn@texaschildrens.org, Kenneth L. Muldrew,  
5 MD<sup>2</sup> muldrew@bcm.edu, Alexandra Berra MD<sup>3</sup> alexandra.berra@bcm.edu, Elizabeth S. Kravitz,  
6 BS<sup>3</sup> elizabeth.kravitz@bcm.edu, Soumya Gogia, BS<sup>3</sup> soumya.gogia@bcm.edu, Irene Martin BSc<sup>4</sup>  
7 irene.martin@canada.ca, Erik Munson PhD<sup>5</sup> erik.munson@marquette.edu

8 *(1) Department of Obstetrics and Gynecology, University of Texas Health Science Center,*  
9 *McGovern Medical School, 6431 Fannin MSB 3.286, Houston, TX 77030, (2) Department of*  
10 *Pathology and Immunology; Baylor College of Medicine, MC315 1 Baylor Plaza Houston, TX*  
11 *77030 832-824-2662, 615-429-6825, (3) Department of Obstetrics and Gynecology; Baylor*  
12 *College of Medicine, 6651 Main Street, Houston, TX 77030 (4) JC Wilt Infectious Diseases*  
13 *Research Centre 745 Logan Avenue, Winnipeg, Manitoba 1 204-789-2000, (5) College of Health*  
14 *Sciences, Marquette University, Schroeder Complex, Room 244 Milwaukee, WI 53233 (414)*  
15 *288-5053*

16  
17 **Contributorship Statement:**

18 All authors were responsible for data entry which was reviewed by the lead author and validated.  
19 Irene A. Stafford MD, Kelsey Hummel MD, James J. Dunn PhD, Kenneth L. Muldrew, MD,  
20 Alexandra Berra MD, Elizabeth S. Kravitz, BS, Soumya Gogia, BS, Irene Martin BSc, and Erik  
21 Munson PhD all contributed to the data collection, data analysis, protocol development and  
22 manuscript preparation. Irene A Stafford, MD is the guarantor for the overall content.

1  
2  
3 **23 Abstract:**  
4  
5  
6

7 24 Background: *Mycoplasma genitalium* is a sexually transmitted infection pathogen. There have  
8  
9 25 been no published studies concerning symptomatology, prevalence data, antibiotic resistance  
10  
11 26 profiling or reports of co-infection with other STI in pregnant women.  
12  
13

14  
15 27 Objective: To describe these characteristics among pregnant women attending prenatal clinics in  
16  
17 28 a large tertiary care center.  
18  
19

20  
21 29 Design: Remnant genital samples collected from pregnant women between August 2018 and  
22  
23 30 November 2019 were tested for *M. genitalium* and *Trichomonas vaginalis* by the transcription-  
24  
25 31 mediated amplification technique. Specimens with detectable *M. genitalium* RNA were sequenced  
26  
27 32 for 23S rRNA mutations associated with azithromycin resistance and parC and gyrA mutations  
28  
29 33 associated with resistance to moxifloxacin. Demographic, obstetric and STI co-infection data were  
30  
31 34 recorded.  
32  
33  
34

35 35 Results: Of the 719 samples, 41 (5.7 %) were positive for *M. genitalium*. *M. genitalium* infection  
36  
37 36 was associated with Black race, Hispanic ethnicity and young age (p= .003, .008 and .004  
38  
39 37 respectively). *M. genitalium* infection was also associated with *T. vaginalis* co-infection and  
40  
41 38 Streptococcus agalactiae (GBS) colonization (p =<0.001 and .002 respectively). Of the 41 positive  
42  
43 39 samples, 26 (63.4%) underwent successful sequencing. Eight (30.8%) had 23S rRNA mutations  
44  
45 40 related to azithromycin resistance. One of 26 (3.8%) positive samples with sequencing results had  
46  
47 41 the gyrA gene mutation and 1 of 18 sequenced samples (5.6%) had the parC gene mutation  
48  
49 42 associated with moxifloxacin resistance.  
50  
51  
52  
53  
54  
55  
56  
57  
58  
59  
60



1  
2  
3 43 Conclusions: Prevalence rates of *M. genitalium* in pregnant women was 5.7%. *M. genitalium*  
4  
5 44 infection disproportionately affects young Black women co-infected with *T. vaginalis*. Pregnant  
6  
7  
8 45 women remain at risk for persistent infection with *M. genitalium* due to decreased azithromycin  
9  
10 46 susceptibility.

#### 12 47 **Strengths and Limitations of this study:**

##### 14 48 Strengths:

- 17 49 • This analysis is one of the largest evaluating prevalence rates of *M. genitalium* in pregnant  
18  
19 50 women presenting for routine care.
- 21 51 • *Mycoplasma genitalium* infection rates were evaluated across race, age and other  
22  
23 52 demographic and obstetrical variables including co-infections with other sexually  
24  
25 53 transmitted infections.
- 26 54 • Antibiotic resistance patterns were determined among isolates collected from pregnant  
27  
28  
29 55 patients presenting for routine care.

##### 33 56 Weaknesses:

- 35 57 • Perinatal outcome data was not recorded.
- 37  
38 58 • Prospective data regarding persistent infection was not collected in this analysis.
- 39  
40  
41 59

#### 42 60 **Funding Statement:**

43  
44  
45 61 This research received no specific grant from any funding agency in the public, commercial or  
46  
47 62 not-for-profit sectors.

#### 49 63 **Competing Interest Statement:**

64 The lead author, Irene A Stafford, MD affirms that this manuscript is an honest, accurate and  
65 transparent account of the study being reported; that no important aspects of the study have been  
66 omitted. The authors report no conflict of interest.

67 The corresponding author confirms on behalf of all authors that there have been no involvements  
68 that might raise the question of bias in the work reported or in the conclusions, implications, or  
69 opinions stated.

#### 70 **Data Sharing:**

71 Extra data can be accessed via the Dryad data repository at <http://datadryad.org/> with the doi:  
72 10.5061/dryad.qrfj6q5fq

74 Word Count: 2021

#### 77 **Introduction:**

78 *Mycoplasma genitalium* is an emerging cause of sexually transmitted disease in women<sup>1-</sup>  
79 <sup>10</sup>. Due to its fastidious nature, culture technique methods have not proven to successfully identify  
80 organism in the clinical environment<sup>1-8</sup>. Fortunately, with the recent developments of highly  
81 sensitive molecular platforms, *M. genitalium* can expeditiously be detected in urogenital samples  
82 with > 97% sensitivity<sup>11-20</sup>. As a result, contemporary studies have demonstrated this organism to  
83 extend beyond the role as a causative agent for non-gonococcal urethritis among men and has now  
84 been implicated in female genital tract pathology, including infectious sequelae similar to  
85 *Chlamydia trachomatis*, such as cervicitis, pelvic inflammatory disease and preterm birth<sup>21-33</sup>.

1  
2  
3 86 To date, six studies have assessed the role of *M. genitalium* with pregnancy related  
4  
5 87 complications, including a 2015 meta-analysis (N = 3,128) in which *M. genitalium* was found to  
6  
7  
8 88 be significantly associated with an increased risk of preterm birth prior to 37 weeks (pooled OR  
9  
10 89 1.89), with an even higher ratio when other STI were accounted for (pooled OR 2.3)<sup>22-28</sup>. The meta-  
11  
12 90 analysis by Lis et. al<sup>28</sup> demonstrated the limitations of prior published data mainly related to  
13  
14  
15 91 varying prevalence rates ranging from 2 – 20 % in women, with scant data concerning rates of  
16  
17 92 infection among pregnant women<sup>4-7,20-33</sup>. Characteristics of *M. genitalium* infection, including  
18  
19 93 antibiotic susceptibility patterns and co-infection rates with other STI agents have not been  
20  
21 94 evaluated in pregnant women presenting for care<sup>22-33</sup>. The objective of this study was to determine  
22  
23  
24 95 these characteristics among a cohort of pregnant women in a large tertiary obstetrical care center.  
25  
26  
27 96  
28  
29

### 30 97 **Design:**

31  
32  
33 98 After Institutional Review Board approval from the Baylor College of Medicine, all  
34  
35 99 remnant Aptima Multitest clinician-collected endocervical samples from pregnant women  
36  
37  
38 100 presenting to care between August 30, 2018 and November 30, 2019 were placed in the Aptima  
39  
40 101 swab specimen transport tube, stored for up to 30 days and shipped monthly by overnight mail to  
41  
42 102 Marquette University, Milwaukee, WI for *M. genitalium* 16S rRNA and *Trichomonas vaginalis*  
43  
44  
45 103 testing by the transcription - mediated amplification technique utilizing Panther System  
46  
47 104 automation (Hologic, Inc., San Diego, CA) as previously described<sup>11-20</sup>. Only one sample  
48  
49 105 collected at intake to care was used for each patient presenting obstetrical care and received  
50  
51 106 testing with the Aptima swab for *N. gonorrhoeae* and *C. trachomatis* per institutional protocol  
52  
53  
54 107 and guidelines.  
55  
56  
57  
58  
59  
60

1  
2  
3 108 *M. genitalium* positive specimens were shipped to the Public Health Agency of Canada,  
4  
5 109 National Microbiology Laboratory for additional testing. DNA was extracted from the specimens  
6  
7  
8 110 using the MagNA Pure DNA and Viral Nucleic Acid kit (Roche, Laval, Quebec) per  
9  
10 111 manufacturer's instruction. Specimens with detectable *M. genitalium* DNA were subsequently  
11  
12 112 analyzed by sequencing the 23S rRNA gene to identify mutations associated with azithromycin  
13  
14 113 resistance and *parC* and *gyrA* genes associated with resistance to moxifloxacin<sup>20,29-33</sup>.

15  
16  
17 114 Demographic variables, obstetrical data, pelvic symptoms consistent with cervicitis (pelvic  
18  
19 115 pressure, vaginal discharge, lower abdominal cramping), and STI co-infection [*Neisseria*  
20  
21 116 *gonorrhoeae*, *Chlamydia trachomatis*, herpes simplex virus, human immunodeficiency virus,  
22  
23 117 *Trichomonas vaginalis*, human papillomavirus (types 16,18)] Bacterial vaginosis and group *B*  
24  
25 118 *Streptococcus* (GBS) colonization data were extracted from the chart and recorded by the  
26  
27 119 investigators. Patient characteristics, co-infection with other STI and *M. genitalium* resistance  
28  
29 120 profiles were summarized by means with standard deviations, or frequencies with percentages.  
30  
31 121 Fisher's exact test or the Wilcoxon Rank Sum test was used to determine differences between  
32  
33 122 women positive and negative for *M. genitalium* in demographic, clinical characteristics, and co-  
34  
35 123 infections with other STIs. Exact 95% confidence intervals (CIs) were determined for the  
36  
37 124 resistance profiles. STROBE guidelines were followed for the study design, methods and  
38  
39 125 analysis<sup>34</sup>. All protected health information was removed from discarded samples prior to shipment  
40  
41 126 and all data was entered into a de-identified database using only study numbers to link information  
42  
43 127 at completion of study. Patient consent was not obtained as this project was a retrospective chart  
44  
45 128 review study involving otherwise discarded samples.

46  
47  
48  
49  
50  
51 129 **Ethics Approval:**  
52  
53  
54  
55  
56  
57  
58  
59  
60

1  
2  
3 130 This study was approved by the Institutional Review Board and Research Review Committee at  
4  
5 131 the Baylor College of Medicine and Harris Health systems, approval number H-1809-2029  
6  
7  
8 132 renewed 7/14/20.

9  
10 133 **Patient and public involvement:**

11  
12 134 Patients or the public were not involved in the design, or conduct, or reporting, or  
13  
14 135 dissemination plans of our research. We used de-identified database involving otherwise discarded  
15  
16 136 samples and chart review. There was no patient involved for this study.

17  
18  
19 137  
20  
21 138 **Results:**

22  
23  
24 139 During the study period, 726 remnant samples were collected from all pregnant women  
25  
26 140 from the obstetric clinics at Baylor College of Medicine that underwent routine STI testing at  
27  
28 141 intake to care. Seven samples were inadequate, leaving 719 available for *M. genitalium* testing. Of  
29  
30 142 these, 41 (5.7%) were positive. The majority of women in the study group were Hispanic, n= 535  
31  
32 143 (74.7%) and 72.8% were multiparous. There were no significant differences in gestational or pre-  
33  
34 144 gestational diabetes, hypertensive disorders in pregnancy and illicit substance use between infected  
35  
36 145 and non-infected women. The demographic and obstetric variables of the study group according  
37  
38 146 to *M. genitalium* infection status are demonstrated in Table 1. The mean age of women infected  
39  
40 147 with *M. genitalium* was younger than non-infected women (24.9 vs. 28.1 years respectively p =  
41  
42 148 .004) and *M. genitalium* was significantly associated with Black race (p =.003) and Hispanic  
43  
44 149 ethnicity (p = .008). (Table 2). At the time of sample collection, 12.1% (85/701) reported pelvic  
45  
46 150 complaints (pelvic pain, vaginal discharge or lower abdominal cramping). Seven women with  
47  
48 151 positive results for infection with *M. genitalium* were symptomatic (18%) compared to 78 women  
49  
50 152 who tested negative for *M. genitalium* infection (11.8%; p = .307).

1  
2  
3 153 Table 3 demonstrates the association between *M. genitalium* and co-infection with other  
4  
5 154 STI. *M. genitalium* infection was significantly associated with women co-infected with  
6  
7  
8 155 *Trichomonas vaginalis* ( $p = <.001$ ). In addition, the rate of group B *Streptococcus* (GBS)  
9  
10 156 colonization was significantly higher among women infected with *M. genitalium* compared to  
11  
12 157 women who tested negative (58.3% vs. 16.1% respectively  $p = .002$ )  
13

14  
15 158 Of the samples with detectable *M. genitalium* RNA, 26 (63.4 %) were of sufficient quantity  
16  
17 159 to undergo conclusive sequencing analysis for azithromycin resistance. Of these, 8/26 (30.7%)  
18  
19 160 were found to have 23S rRNA mutations (A2059G) associated with azithromycin resistance. Of  
20  
21 161 the 18 samples that were of sufficient quantity to undergo sequencing analysis for the *parC* gene  
22  
23 162 mutation, one (5.6%) was found to have the *parC* (Ser→Asn83) gene mutation. Of the 26 samples  
24  
25 163 that were of sufficient quantity to undergo sequencing analysis for the *gyrA* gene mutation, one  
26  
27 164 (3.8%) was found to have that gene mutation. Both *parC* and *gyrA* gene mutations are associated  
28  
29 165 with moxifloxacin resistance. Sequencing results of all samples are demonstrated in Table 4.  
30  
31  
32

### 33 166

### 35 167 **Discussion:**

36  
37 168 Prevalence rates of *M. genitalium* in this large cohort of pregnant women approximate rates  
38  
39 169 reported in non-pregnant women at 5.7%<sup>4-7,20-33</sup>. Infection with *M. genitalium* was more prevalent  
40  
41 170 among women at risk for other STI including Black race, young age and co-infection with *T.*  
42  
43 171 *vaginalis* ( $p < .05$  for all). Although macrolide resistance patterns from isolates collected from non-  
44  
45 172 pregnant patients approach 50%, azithromycin resistance was detected in 30% of isolates collected  
46  
47 173 from the cohort and 5.6% demonstrated moxifloxacin resistance<sup>29-33,35-41</sup>.  
48  
49

50  
51 174 As described in prior studies, infection with *M. genitalium* was found to be more prevalent among  
52  
53 175 pregnant women compared to *N. gonorrhoeae*, where reported prevalence rates in women remain  
54  
55  
56  
57  
58  
59

1  
2  
3 176 less than 1%<sup>2-10,20-33,38,41</sup>. The adverse health impacts of the more common STI, including *N.*  
4  
5 177 *gonorrhoeae*, syphilis, *C. trachomatis*, and herpes simplex virus on pregnant women are well  
6  
7 178 understood<sup>2-10</sup>. These have been studied for decades and standard screening and treatment  
8  
9 179 protocols are practiced nationwide with the support of evidence-based guidelines and  
10  
11 180 recommendations for clinical management<sup>10</sup>. A comparable body of evidence is not available for  
12  
13 181 *M. genitalium*, largely because this organism is relatively understudied as a cause of female genital  
14  
15 182 tract infectious morbidity<sup>6,7,9</sup>. A contributing factor to this paradox is that researchers have been  
16  
17 183 unable to apply many of the same culture-based mechanisms and point-of-care testing often used  
18  
19 184 for the diagnosis of other STI toward detection of *M. genitalium*<sup>11-20</sup>.

20  
21  
22  
23  
24 185 With the advent of molecular-based technologies used in research protocols evaluating  
25  
26 186 associations of *M. genitalium* with adverse reproductive outcomes, this organism has been  
27  
28 187 associated with premature birth, premature rupture of membranes, spontaneous abortion, cervicitis  
29  
30 188 and infertility, implicating this organism as a pathogen in pregnant as well as non-pregnant  
31  
32 189 women<sup>11-19, 22-33</sup>. Further understanding of this infection as it relates to pregnancy and adverse  
33  
34 190 perinatal outcomes begins with understanding its characteristics as an STI; its association with  
35  
36 191 obstetrical factors, demographics, co-infection patterns and pelvic symptomatology as described  
37  
38 192 in our analysis.

39  
40  
41  
42  
43 193 A unique finding of this study relates to antimicrobial susceptibility profiles of *M.*  
44  
45 194 *genitalium* isolated from this pregnant cohort. Although detection rates of macrolide resistance  
46  
47 195 determinants approach 30% in our population, published rates of macrolide resistance approach  
48  
49 196 50% in isolates collected from men<sup>22-33,35,39</sup>. In some countries, strains of multi-drug resistant *M.*  
50  
51 197 *genitalium* strains exist, limiting therapeutic options<sup>22-33,35,39</sup>. Although the predicted azithromycin  
52  
53 198 resistance is significantly less in this population compared to prior published reports involving  
54  
55  
56  
57  
58  
59  
60

1  
2  
3 199 men and women, pregnant women remain at significant risk for persistent antenatal infection due  
4  
5 200 to decreased azithromycin susceptibility. The number of cases (n=2) identified with predicted  
6  
7 201 moxifloxacin resistance in this study was low, but it is of concern as extended dose moxifloxacin  
8  
9 202 is currently one of the few alternative options for treatment of macrolide-resistant *M. genitalium*  
10  
11 203 strains, an option not available to pregnant women due to potential fetal teratogenicity and the  
12  
13 204 assigned pregnancy classification<sup>10,36-39</sup>.

14  
15  
16  
17  
18 205 Pristinamycin, an antimicrobial agent synthesized from macrolide and depsipeptide  
19  
20 206 components, has demonstrated promising results as a second-line treatment option with a 75%  
21  
22 207 cure rate of *M. genitalium* in preliminary studies<sup>39</sup>. Although not significantly different from  
23  
24 208 moxifloxacin in treatment efficacy among non-pregnant people, pristinamycin remains a potential  
25  
26 209 option during pregnancy and in other situations where fluoroquinolones have failed or are  
27  
28 210 contraindicated<sup>39</sup>.

29  
30  
31 211 Data on which to determine whether prenatal treatment of *M. genitalium* can reduce the  
32  
33 212 incidence of pelvic complaints, preterm birth or any other adverse perinatal outcome is still  
34  
35 213 lacking. Future research is warranted to examine relationships between mycoplasmas and  
36  
37 214 pregnancy, given that some of these organisms may be mechanistically related in their ability to  
38  
39 215 induce inflammatory cytokines, potentially leading to preterm labor<sup>11-19,22-28</sup>. This gap in  
40  
41 216 knowledge is a significant impediment for implicating this organism as a notifiable cause of  
42  
43 217 reproductive tract disease, and for evidence-based improvement of the current prenatal STI-  
44  
45 218 screening and treatment guidelines.

46  
47  
48 219 The limitations of our study include the lack of perinatal outcome correlates and a low  
49  
50 220 representation of other STI. The number required to determine meaningful perinatal outcome data,  
51  
52 221 i.e. preterm birth, after adjusting for prior preterm birth, using a conservative odds ratio of 1.3 per  
53  
54  
55  
56  
57  
58  
59  
60



1  
2  
3 222 Lis et al. would require over 17,000 patients to determine a 30% difference in this outcome, even  
4  
5 223 when using higher published prevalence rates among women of 15% and a macrolide resistance  
6  
7 224 rate of 25%<sup>22-33,40</sup>. The information provided in this manuscript can inform research scientists for  
8  
9 225 future prospective studies including a large, randomized-controlled treatment trial to prevent  
10  
11 226 preterm birth related to *M. genitalium* infection.

12  
13  
14 227 Of note, the co-infection rate of *Trichomonas vaginalis* with *M. genitalium* was significant,  
15  
16 228 as was the association of this infection with demographic risk factors common among women with  
17  
18 229 other STI, such as young age and Black race<sup>1-10,20-22,40,41</sup>. An additional interesting result is the  
19  
20 230 significantly higher association of group B streptococcal (GBS) colonization in women infected  
21  
22 231 with *M. genitalium*, a relationship worthy of further investigation. Sample processing was an  
23  
24 232 additional limitation to the study as samples were shipped across multiple sites, subjecting the  
25  
26 233 samples to pre-processing degradation. Only 68% of samples contained sufficient material for  
27  
28 234 sequencing for conclusive antibiotic resistance profiling. As these samples were remnant samples  
29  
30 235 that had undergone testing for *N. gonorrhoeae* and *C. trachomatis* prior to *M. genitalium* testing,  
31  
32 236 the potential for a reduction in sample quantity was not unexpected, contributing to lower yields.  
33  
34 237 Further prospective studies involving sample collection for *M. genitalium* testing either alone or  
35  
36 238 simultaneously with other STI detected by the Panther transcription - mediated - amplification  
37  
38 239 method would result in higher concentrations of genetic material for sequencing analysis.  
39  
40  
41  
42  
43  
44

45 240

#### 46 47 241 **Conclusion:**

48  
49 242 Our analysis demonstrates that the prevalence of *M. genitalium* is 5.7% among a large  
50  
51 243 cohort of pregnant women attending prenatal care in an urban academic center. *M. genitalium*  
52  
53 244 shares features of other STI including common demographic risk factors, such as Black race and  
54  
55  
56  
57  
58  
59

1  
2  
3 245 young age. Of the samples with detectable *M. genitalium* RNA that underwent sequencing, 30%  
4  
5 246 were found to have mutations for resistance to azithromycin. If future studies demonstrate a  
6  
7 247 relationship between *M. genitalium* and adverse perinatal outcomes, alternative therapeutic  
8  
9 248 regimens based on antibiotic susceptibility profiles will need to be determined for the pregnant  
10  
11 249 patient harboring this STI.  
12  
13  
14  
15 250

For peer review only

## 251 References

- 252 1. Manhart LE, Holmes KK, Hughes JP, Houston LS, Totten PA. *Mycoplasma genitalium*  
253 among young adults in the United States: an emerging sexually transmitted infection. *Am*  
254 *J Public Health* 2007; 97:1118-25.
- 255 2. McGowin CL, Anderson-Smits C, 2011 *Mycoplasma genitalium*: An emerging cause of  
256 sexually transmitted disease in women. *PLoS Pathog* 7(5):e1001-324.
- 257 3. Seña AC, Lee JY, Schwebke J, Philip SS, Wiesenfeld HC, Rompalo AM, Cook RL, Hobbs  
258 MM. A silent epidemic: the prevalence, incidence and persistence of *Mycoplasma*  
259 *genitalium* among young, asymptomatic high-risk women in the United States. *Clin Infect*  
260 *Dis*. 2018 Jan 12. doi: 10.1093/cid/ciy025
- 261 4. Leli C, Mencacci A, Latino MA, Clerici P, Rassu M, Perito S, Castronari R, Pistoni E,  
262 Luciano E, De Maria D, Morazzoni C, Pascarella M, Bozza S, Sensini A. Prevalence of  
263 cervical colonization by *Ureaplasma parvum*, *Ureaplasma urealyticum*, *Mycoplasma*  
264 *hominis* and *Mycoplasma genitalium* in childbearing age women by a commercially  
265 available multiplex real-time PCR: An Italian observational multicentre study. *J Microbiol*  
266 *Immunol Infect*. 2017 Jun 28. pii: S1684-1182(17)30091-9.
- 267 5. Anagnrius C, Lore B, Jensen JS *Mycoplasma genitalium*: prevalence, clinical significance  
268 and transmission. *Sex Transm Infect* 2005;81:458-462.
- 269 6. Wiesenfeld HC, Manhart LE. *Mycoplasma genitalium* in Women: Current Knowledge and  
270 Research Priorities for This Recently Emerged Pathogen. *J Infect Dis*. 2017 Jul  
271 15;216(suppl\_2):S389-S395. doi: 10.1093/infdis/jix198
- 272 7. Martin DH. *Mycoplasma genitalium* From Basic Science to Public Health Implications:  
273 Results of a National Institute of Allergy and Infectious Diseases Technical Consultation.  
274 *J Infect Dis* 2017(216)suppl 2S381.
- 275 8. McGowin CL, Totten PA The unique microbiology and molecular pathogenesis of  
276 *Mycoplasma genitalium*. *J Infect Dis* 2017;216(suppl2)S382-388.
- 277 9. Manhart LE, Broad JM, Golden MR. *Mycoplasma genitalium*; Should we treat and how?  
278 *Clin Infect Dis* 2011;53(Suppl 3):S129-42.
- 279 10. Centers for Disease Control and Prevention. Sexually Transmitted Diseases Treatment  
280 Guidelines and STD surveillance data 2018, 2015.
- 281 11. Gaydos, C *Mycoplasma genitalium*: accurate diagnosis is necessary for adequate treatment.  
282 *Journal of Infectious dis* 2017(2)S406-11; Yoshida T, Maeda SI, Deguchi T, et al. Rapid  
283 detection of *Mycoplasma genitalium* *Mycoplasma hominis*, *Ureaplasma parvum* and  
284 *Ureaplasma urealyticum*. *J Clin Microbiol* 2003 (41)5:1850-55.
- 285 12. Yoshida T, Maeda SI, Deguchi T, et al. Rapid detection of *Mycoplasma genitalium*  
286 *Mycoplasma hominis*, *Ureaplasma parvum* and *Ureaplasma urealyticum*. *J Clin Microbiol*  
287 2003 (41)5:1850-55.
- 288 13. Munson E, Bykowski H, Munson KL et al. Clinical laboratory assessment of *Mycoplasma*  
289 *genitalium* transcription mediated amplification using primary female urogenital  
290 specimens. *J Clin Microbiol* 2016;54:432-8.
- 291 14. Jensen JS, Uldum SA, Sondergard-Andersen J, et al. Polymerase chain reaction for  
292 detection of *Mycoplasma genitalium* in clinical samples. *J Clin Microbiol* 1991;29:46-50.

- 1  
2  
3 293 15. Jensen JS. Protocol for the detection of *Mycoplasma genitalium* by PCR from clinical  
4 294 specimens and subsequent detection of macrolide resistance-mediating mutations in region  
5 295 V of the 23SrRNA gene. *Method Molec Biol* 2012, 903:129-139.
- 7 296 16. Wroblewski JK, Manhart LE, Dickey KA. Comparison of transcription-mediated  
8 297 amplification and PCR assay results for various genital specimen types for detection of  
9 298 *Mycoplasma genitalium*. *J Clin Microbiol*. 2006; 44:3306-12. doi:10.1128/JCM.00553-06
- 11 299 17. Gaydos CA, Manhart LE, Taylor SN, et al. Molecular Testing for *Mycoplasma*  
12 300 *genitalium* in the United States: Results from the AMES Prospective Multicenter Clinical  
13 301 Study. *J Clin Microbiol*. 2019;57(11):e01125-19. Published 2019 Oct 23.  
14 302 doi:10.1128/JCM.01125-19
- 15 303 18. Jensen JS, Bjornelius E, Dohn B, Lidbrink P. Use of TaqMan5 nuclease real time PCR  
16 304 for quantitative detection of *Mycoplasma genitalium* DNA with and without urethritis  
17 305 who were attendees at a sexually transmitted disease clinic *J Clin Microbiol* 2004(42)  
18 306 683-92.
- 20 307 19. Hardick J, Giles J, Hardick A, Hsieh YH, et al. Performance of the gen-probe  
21 308 transcription-mediated amplification research assay compared to that of a multitarget  
22 309 real-time PCR for *Mycoplasma genitalium* detection. *J Clin Microbiol* 2006(44)1236-40
- 23 310 20. Getman D, Jiang A, O'Donnell M, Cohen S. *Mycoplasma genitalium* prevalence,  
24 311 coinfection and macrolide antibiotic resistance frequency in a multicenter clinical study  
25 312 cohort in the United States. *J Clin Microbiol* 54:2278-83
- 27 313 21. Anagrus C, Lore B, Jensen JS *Mycoplasma genitalium*: prevalence, clinical significance  
28 314 and transmission. *Sex Transm Infect* 2005;81:458-462.
- 29 315 22. Barreto Campos G, Neves Lobao T, Amorim A, et al. Prevalence of *M. genitalium* and  
30 316 *M. hominis* in urogenital tract of Brazilian women. *BCM Infectious Diseases*,  
31 317 2015(15):60.
- 33 318 23. Larsen B, Hwang J. *Mycoplasma, Ureaplasma*, and adverse pregnancy outcomes: a fresh  
34 319 look. *Infect Dis Obstet Gynecol* 2010; 2010.
- 35 320 24. Trent M, Coleman JS, Hardick J, et al. Biohealth study: Clinical and Sexual Risk  
36 321 Correlates of *Mycoplasma genitalium* in Urban Pregnant and Non-Pregnant Young  
37 322 Women. *J Pediatr Adolesc Gynecol* 2017; 30: 299- 331
- 38 323 25. Rittenschober-Böhm J, Waldhoer T, Schulz SM, Stihsen B, Pimpel B, Goeral K, Hafner  
39 324 E, Sliutz G, Kasper DC, Witt A, Berger A. First Trimester Vaginal *Ureaplasma Biovar*  
40 325 *Colonization and Preterm Birth: Results of a Prospective Multicenter Study*. *Neonatology*.  
41 326 2017 Sep 22;113(1):1-6.
- 43 327 26. Averbach SH, Hacker MR, Yiu T, Modest AM, Dimitrakoff J, Ricciotti HA. *Mycoplasma*  
44 328 *genitalium* and preterm delivery at an urban community health center. *Int J Gynaecol*  
45 329 *Obstet* 2013; 123:54-7.
- 46 330 27. Donders GGG, Ruban K, Bellen G, Petricevic L. *Mycoplasma/Ureaplasma* infection in  
47 331 pregnancy: to screen or not to screen. *J Perinat Med*. 2017 Jul 26;45(5):505-515. doi:  
48 332 10.1515/jpm-2016-0111.
- 50 333 28. Lis R, Rowhani-Rahbar A, Manhart LE. *Mycoplasma genitalium* Infection and Female  
51 334 Reproductive Tract Disease: A Meta-analysis. *Clin Infect Dis* 2015; 61:418-26.
- 52 335 29. Horner P, Ingle SM, Garrett F, Blee K, Kong F, Muir P, Moi H. Which azithromycin  
53 336 regimen should be used for treating *Mycoplasma genitalium*, A meta-analysis. *Sex*  
54 337 *Transm Infect*. 2017 Jul 1

- 1  
2  
3 338 30. Lau A, Bradshaw CS, Lewis D, et al. The Efficacy of Azithromycin for the Treatment of  
4 339 Genital *Mycoplasma genitalium*: A Systematic Review and Meta-analysis. Clin Infect  
5 340 Dis. 2015;61(9):1389-99  
6 341 31. Shimada Y, Deguchi T, Nakane K, et al. Emergence of clinical strains of *Mycoplasma*  
7 342 *genitalium* harbouring alterations in *ParC* associated with fluoroquinolone resistance. Int  
8 343 J Antimicrob Agent 2010, 36:255-8.  
9 344 32. Wikstrøm J, Jensen JS. *Mycoplasma genitalium*: a common cause of persistent urethritis  
10 345 among men treated with doxycycline. Sex Transm Infect. 2006; 82:276-279.  
11 346 33. Hilton J, Azariah S, Reid M. A case-control study of men with non-gonococcal urethritis  
12 347 at Auckland Sexual Health Service: rates of detection of *Mycoplasma genitalium*. Sex  
13 348 Health. 2010;7(1):77-81.  
14 349 34. Vandembroucke JP, von Elm E, Altman DG, Gøtzsche PC, Mulrow CD, Pocock SJ, et al.  
15 350 (2007) Strengthening the Reporting of Observational Studies in Epidemiology  
16 351 (STROBE): Explanation and Elaboration. PLoS Med 4(10): e29  
17 352 35. Deguchi T, Yoshida T, Yokoi S et al. Longitudinal quantitative detection of *Mycoplasma*  
18 353 *genitalium* in first pass urine of men with recurrent non-Gonococcal urethritis. J Clin  
19 354 Microbiol 2002;40:3854-6.  
20 355 36. Friedman JM and Polifka JE. Teratogenic Effects of Drugs. A Resource for Clinicians  
21 356 (TERIS). Baltimore, MD: The Johns Hopkins University Press: 2000: 149-195.  
22 357 37. Cziezel AE and Rockenbauer M. Teratogenic study of Doxycycline. Obstet  
23 358 Gynecol 1997; 89:524-528.  
24 359 38. Horne HW Jr. and Kundsinn RB. The role of mycoplasma among 81 consecutive  
25 360 pregnancies: a prospective study. Int J Fertil 1980; 25:315-317.  
26 361 39. Read T, Jensen JS, Fairley CK, et al. Use of Pristinamycin for Macrolide-Resistant  
27 362 *Mycoplasma genitalium* Infection. Emerg Infect Dis. 2018;24(2):328-335.  
28 363 <https://doi.org/10.3201/eid2402.170902>  
29 364 40. Nye MB, Harris AB, Pherson AJ, Cartwright CP. Prevalence of *Mycoplasma genitalium*  
30 365 infection in women with bacterial vaginosis. BMC Womens Health. 2020 Mar  
31 366 26;20(1):62. doi: 10.1186/s12905-020-00926-6. PMID: 32216785; PMCID:  
32 367 PMC7099815.  
33 368 41. Smullin CP, Green H, Peters R, et al. Prevalence and incidence of *Mycoplasma*  
34 369 *genitalium* in a cohort of HIV-infected and HIV-uninfected pregnant women in Cape  
35 370 Town, South Africa. Sex Transm Infect. 2020 Nov;96(7):501-508. doi: 10.1136/sextrans-  
36 371 2019-054255. Epub 2020 Jan 13. PMID: 31932358; PMCID: PMC7354884.  
37 372  
38 373  
39 374  
40 375  
41 376  
42 377

Table 1. Demographics and Baseline Obstetrical Characteristics

|                                                                                          | <i>M. genitalium</i><br>Positive<br>(N=41) | <i>M. genitalium</i><br>Negative<br>(N=678) | p-value**                      | Total<br>Population<br>(N=719) |
|------------------------------------------------------------------------------------------|--------------------------------------------|---------------------------------------------|--------------------------------|--------------------------------|
| Age, mean (std)                                                                          | 24.9 (4.89)                                | 28.1 (6.93)                                 | <b>0.004</b>                   | 27.9 (6.87)                    |
| < 20                                                                                     | 5 (12.2)                                   | 80 (11.9)                                   | 0.021                          | 85 (11.9)                      |
| 20-34                                                                                    | 35 (85.4)                                  | 462 (68.4)                                  |                                | 497 (69.4)                     |
| 35 or more                                                                               | 1 (2.4)                                    | 133 (19.7)                                  |                                | 134 (18.7)                     |
| Race/ethnicity                                                                           | 41                                         | 675                                         | <b>0.003*</b><br><b>0.004^</b> | 716                            |
| White/Hispanic                                                                           | 23 (56.1)                                  | 522 (77.3)                                  |                                | 545 (76.1)                     |
| White/Non-Hispanic                                                                       | 4 (9.8)                                    | 26 (3.9)                                    |                                | 30 (4.2)                       |
| Black/Hispanic                                                                           | 0                                          | 2 (0.3)                                     |                                | 2 (0.3)                        |
| Black/Non-Hispanic                                                                       | 14 (34.2)                                  | 99 (14.7)                                   |                                | 113 (15.8)                     |
| Other (Asian, Native<br>Hawaiian/Pacific Islander,<br>American Indian/Alaskan<br>Native) | 0                                          | 21 (3.1)                                    |                                | 21 (2.9)                       |
| Unknown                                                                                  | 0                                          | 5 (0.7)                                     |                                | 5 (0.7)                        |
| Nulliparous                                                                              | 18 (42.9)                                  | 183 (27.2)                                  | 0.031                          | 201 (28.2)                     |
| Hypertensive disorders of<br>pregnancy                                                   | 5/39 (12.8)                                | 54/658 (8.2)                                | 0.3661                         | 59/697 (8.5)                   |
| Diabetes Mellitus (GDM, or<br>pre-gestational DM)                                        | 1/39 (2.6)                                 | 67/658 (10.2)                               | 0.1637                         | 68/697 (9.8)                   |
| Illicit drug use during<br>pregnancy                                                     | 0/38 (0)                                   | 25/654 (3.8)                                | 0.390                          | 25/692 (3.6)                   |
| Tobacco use during<br>pregnancy                                                          | 2/38 (5.3)                                 | 14/655 (2.1)                                | 0.2171                         | 16/693 (2.3)                   |
| Alcohol use during<br>pregnancy                                                          | 3/38 (7.9)                                 | 11/652 (1.7)                                | 0.0368                         | 14/690 (2.0)                   |

|                                       |              |               |       |               |
|---------------------------------------|--------------|---------------|-------|---------------|
| GA at specimen collection, mean (std) | 22.4 (10.90) | 22.2 (10.81)  | 0.816 | 22.2 (10.81)  |
| Previous Preterm (< 37 wks)           | 2/39 (5.1)   | 63/664 (9.5)  | 0.568 | 65/703 (9.3)  |
| Previous PROM (< 37 wks)              | 0/39 (0)     | 15/651 (2.3)  | 1.00  | 15/690 (2.2)  |
| Cervicitis symptoms^^                 | 7/39 (18.0)  | 78/662 (11.8) | 0.307 | 85/701 (12.1) |
| Cerclage in index pregnancy           | 0/39 (0)     | 6/664 (0.9)   | 1.00  | 6/703 (0.9)   |
| Twin Pregnancy                        | 0/39 (0)     | 9/670 (1.3)   | 1.00  | 9/709 (1.3)   |

378 Data presented as N (%) unless otherwise specified

379 \*p-value compares black vs non-black.

380 ^p-value compares Hispanic (including Mexican and unknown) vs. non-Hispanic. \*\*p-value from Fisher's exact test or Wilcoxon Rank Sum test.

381 ^^Any of the following symptoms: pelvic pressure, vaginal discharge or lower abdominal cramping

382 **Bolded** if significantly different

384

385 Table 2: *Mycoplasma genitalium* RNA Detection rates from genital swab collections by  
386 Race/Ethnicity

|                                                                                 | <b><i>Detection of Mycoplasma genitalium</i></b><br><b>RNA</b><br><b>[n/N1 (% of subjects)]</b> |
|---------------------------------------------------------------------------------|-------------------------------------------------------------------------------------------------|
| Race/Ethnicity                                                                  |                                                                                                 |
| White/Hispanic                                                                  | 23/545 (4.2)                                                                                    |
| White/Non-Hispanic                                                              | 4/30 (13.3)                                                                                     |
| Black/Hispanic                                                                  | 0/2 (0)                                                                                         |
| Black/Non-Hispanic                                                              | 14/113 (12.4)                                                                                   |
| Other (Asian, Native Hawaiian/Pacific Islander, American Indian/Alaskan Native) | 0/21 (0)                                                                                        |
|                                                                                 |                                                                                                 |
| Race, p-value*                                                                  | 0.003                                                                                           |
| Black                                                                           | 14/115 (12.2)                                                                                   |
| Non-Black                                                                       | 27/601 (4.5)                                                                                    |

1  
2  
3  
4  
5  
6  
7  
8  
9  
10  
11  
12  
13  
14  
15  
16  
17  
18  
19  
20  
21  
22  
23  
24  
25  
26  
27  
28  
29  
30  
31  
32  
33  
34  
35  
36  
37  
38  
39  
40  
41  
42  
43  
44  
45  
46  
47  
48  
49  
50  
51  
52  
53  
54  
55  
56  
57  
58  
59  
60

|                     |               |
|---------------------|---------------|
| Ethnicity, p-value* | 0.008         |
| Hispanic            | 23/535 (4.3)  |
| Non-Hispanic        | 18/179 (10.1) |

387 p-value from Fisher's exact test.

388

For peer review only



389 Table 3. Co-Infections with *M. genitalium*

|                                | <i>M. genitalium</i><br>Positive (N=41)<br>n/N1 (%) | <i>M. genitalium</i><br>Negative (N=678)<br>n/N1 (%) | p-value          | Total<br>Population<br>(N=719) |
|--------------------------------|-----------------------------------------------------|------------------------------------------------------|------------------|--------------------------------|
| Human papillomavirus 16,<br>18 | 4/14 (28.6)                                         | 43/281 (15.3)                                        | 0.251            | 47/295 (15.9)                  |
| <i>Bacterial vaginosis</i>     | 5/18 (27.8)                                         | 98/340 (28.8)                                        | 1.000            | 103/255 (28.8)                 |
| <i>Trichomonas vaginalis</i>   | 7/40 (17.5)                                         | 18/677 (2.7)                                         | <b>&lt;0.001</b> | 25/717 (3.5)                   |
| <i>Chlamydia trachomatis</i>   | 6/39 (15.4)                                         | 54/670 (8.1)                                         | 0.131            | 60/709 (8.5)                   |
| <i>Neisseria gonorrhoeae</i>   | 0/39 (0)                                            | 7/670 (1.0)                                          | 1.000            | 7/709 (1.0)                    |
| Hepatitis B                    | 0/39 (0)                                            | 2/637 (0.3)                                          | 1.000            | 2/676 (0.3)                    |
| Hepatitis C                    | 0/17 (0)                                            | 1/281 (0.4)                                          | 1.000            | 1/298 (0.3)                    |
| Syphilis                       | 1/37 (2.7)                                          | 8/639 (1.3)                                          | 0.399            | 9/676 (1.3)                    |
| Herpes Simplex Virus I/II      | 3/6 (50.0)                                          | 23/104 (22.1)                                        | 0.143            | 26/110 (23.6)                  |
| <i>Group B Streptococcus</i>   | 7/12 (58.3)                                         | 40/248 (16.1)                                        | 0.002            | 47/260 (18.1)                  |

390 N1=number of women tested for the infection with a non-missing value. P-value from Fisher's exact test.

391

392

393

394

Table 4. Prevalence of *M. genitalium* and Resistance profiles

|                               | Total (N=726) | 95% CI      |
|-------------------------------|---------------|-------------|
| N with sample tested          | 719           |             |
| <i>M. genitalium</i> positive | 41 (5.7)      | 4.0 - 7.4** |
| 23S                           |               |             |
| A2058G*                       | 3 (7.3)       | 1.5 - 19.9  |
| A2058T*                       | 2 (4.9)       | 0.6 - 16.5  |
| A2059G*                       | 3 (7.3)       | 1.5 - 19.9  |
| No sequence*                  | 15 (36.6)     | 22.1 - 53.1 |
| WT*                           | 18 (43.9)     | 28.5 - 60.3 |

|                                                          |             |               |
|----------------------------------------------------------|-------------|---------------|
| Mutation related to azithromycin resistance <sup>^</sup> | 8/26 (30.8) | 14.3 - 51.8   |
| gyrA                                                     |             |               |
| 95MET(ATG)->ILE(ATC)*                                    | 1 (2.4)     | 0.06 - 12.9   |
| Inconclusive*                                            | 1 (2.4)     | 0.06 - 12.9   |
| No sequence*                                             | 12 (29.3)   | 16.1 - 45.5   |
| WT*                                                      | 25 (60.9)   | 49.4 - 79.9   |
| gyrA mutation <sup>^</sup>                               | 1/26 (3.8)  | 0.09 - 18.4   |
| parC                                                     |             |               |
| 83SER(AGT)->ILE(ATT)*                                    | 1 (2.4)     | 0.06 - 12.9   |
| 83SER(AGT)->ASN(AAT)*                                    | 0           | 0 - 8.6       |
| Inconclusive*                                            | 9 (22.0)    | 10.6 - 37.6   |
| No sequence*                                             | 14 (34.2)   | 20.1 - 50.6   |
| WT <sup>^^</sup>                                         | 17 (41.5)   | 26.3 - 57.9   |
| parC mutation <sup>^</sup>                               | 1/18 (5.6)  | 0.14 - 27.3   |
| <i>M. genitalium</i> Negative                            | 678 (94.3)  | 92.6 - 96.0** |
| <i>M. genitalium</i> positive                            | 1 (5.9)     | 0.15 - 28.7   |
| <i>M. genitalium</i> Negative                            | 16 (94.1)   | 71.3 - 99.9   |

395 Data presented as N (%)

396 \*Percent of positive for *M. genitalium*

397 Exact 95% confidence intervals (CI) except for \*\* which are based on the normal approximation.

398 <sup>^</sup> Denominator is positive samples with conclusive sequencing results

399 <sup>^^</sup> Wild type

400

401

402

403
